# Supplementary material for: Fundamentally intertwined: anharmonic intermolecular interactions dictate both thermal expansion and terahertz lattice dynamics in molecular crystals
Source: Royal Society of Chemistry journal article supplement (doi:10.1039/d4cc03307h), 2024-01-01
Supplement: d4cc03307h1.pdf [file d4cc03307h1.pdf]

# Electronic Supplementary Information For: Fundamentally Intertwined: Anharmonic Intermolecular Interactions Dictate Both Thermal Expansion and Terahertz Lattice Dynamics in Molecular Crystals

Navkiran Juneja,<sup>†</sup> Josephine L. Hastings,<sup>†</sup> William B. Stoll,<sup>†</sup> William W.  
Brennessel,<sup>†</sup> Salvatore Zarrella,<sup>‡</sup> Parker Sornberger,<sup>†</sup> Luca Catalano,<sup>†,¶</sup> Timothy  
M. Korter,<sup>‡</sup> and Michael T. Ruggiero<sup>\*,†</sup>

<sup>†</sup>*Department of Chemistry, University of Rochester, Hutchinson Hall, Rochester, New York  
14627, United States of America*

<sup>‡</sup>*Department of Chemistry, Syracuse University, Syracuse, New York, 13244, United States of  
America*

<sup>¶</sup>*Department of Life Sciences, University of Modena and Reggio Emilia, Modena, IT*

E-mail: michael.ruggiero@rochester.edu

# 1 Structure of TMA-Azo

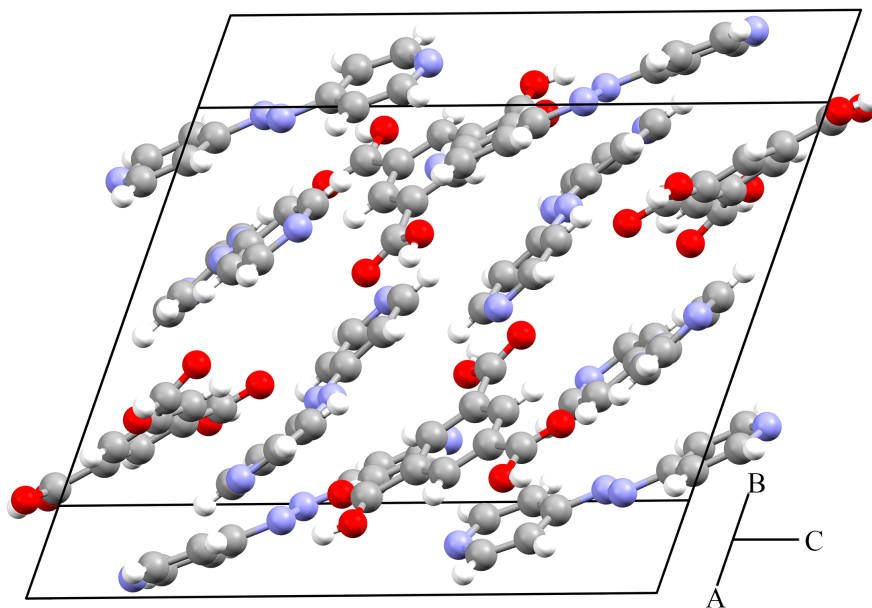

**Figure 1:** Structure of TMA-azo from the 100K single-crystal XRD structure.

## 2 Methods

### 2.1 Experimental

#### 2.1.1 Synthesis of TMA-Azo

TMA-azo were obtained by dissolving a 2:3 molar equivalent of TMA (77 mg, 0.37 mmol) and azo (100 mg, 0.54 mmol) in 1mL of DMSO, as previously reported.<sup>1</sup> The clear orange homogeneous solution prepared was left on the benchtop overnight. Dark, orange-colored single crystals suitable for single crystal X-ray diffraction experiments were grown overnight. These crystals were dried on the filter paper overnight and were used for further spectroscopic data collection.

### 2.1.2 Single-Crystal X-ray Diffraction

Data collection, structure solution, and structure refinement were conducted at the X-ray Crystallographic Facility in the Department of Chemistry at the University of Rochester.

**Data Collection:** A crystal (0.4 mm × 0.354 mm × 0.126 mm ) was placed onto a 100 μm MiTeGen cyloop loop and mounted on a Rigaku XtaLAB Synergy-S Dualflex diffractometer equipped with a PhotonJet X-ray source operated at 50 W (50kV, 1 mA) to generate Cu Kα radiation ( $\lambda = 1.54184 \text{ \AA}$ ). Crystals were transferred from the vial and placed on a glass slide in polyisobutylene. A Leica microscope with a Zeiss base was used to identify a suitable specimen for X-ray diffraction experiments from a representative sample of the material. A preliminary set of cell constants and an orientation matrix were calculated from a small sampling of reflections. A short pre-experiment was run at 100 K, from which an optimal data collection strategy was determined at this specific temperature and further used for data collection at subsequent temperatures. Data were collected with frame times of 0.07 and 0.29 seconds at a detector distance of 34.0 mm, and at temperatures of 100K, 110K, 130K, 150K, and 170K, with a transition rate of 2K/minute between the temperatures. The samples were optically centered with the aid of a video camera to ensure that no translations were observed as the crystal was rotated through all positions.

**Structure solution and refinement:** After data collection, the unit cell was re-determined using a subset of the full data collection. Intensity data were corrected for Lorentz, polarization, and background effects using CrysAlisPro. A numerical absorption correction was applied based over a multifaceted crystal and followed by a semi-empirical correction for absorption applied using the program SCALE3 ABSPACK. The structure was solved using SHELXT, and refined with SHELXL,<sup>2</sup> within the Olex2 software package.<sup>3</sup> All non-hydrogen atoms were refined with anisotropic displacement parameters. The azo and one of the pyridine rings in one of the crystallographically unique bipyridine molecules were modeled as positionally disordered over two sites

(A and B) at 170K. The two bipyridines showed no disorder before 170K and the crystal structure is fully ordered at temperatures 150K, 130K, 110K, and 100K. The site occupancy values for the A and B sites at 170K are located in the CIFs under the “\_refine\_special\_details” section and are 0.94/0.06. To help model these disordered sites, SIMU and RIGU restraints were applied. Hydrogen atoms bound to carbon and oxygen atoms were located in the difference Fourier map and were geometrically constrained using the appropriate AFIX commands.

### 2.1.3 Terahertz Spectroscopy

All THz-TDS data were collected using a commercial Teraflash Pro spectrometer (Toptica Photonics AG). A pair of fiber-coupled photoconductive antennas served as emitter and a receiver, respectively, and two pairs of off-axis parabolic mirrors were utilized to collimate and focus the terahertz radiation. The entire was subjected to constant dry air purging to remove absorption features from atmospheric water vapor rotational transitions. Pellets were prepared for the THz-TDS experiments by mixing polytetrafluoroethylene (PTFE) with TMA-azo to a 3% w/w concentration. After mixing and grinding both in a mortar and pestle, the mixture was compressed to produce 3-mm thick sample tablets (compressed with ca. 225 MPa of pressure) in a 13-mm-diameter die (Specac). The temperature was controlled using liquid nitrogen in a vacuum-purged cryostat system. Frequency-domain terahertz power spectra were obtained by averaging 20,000 time-domain waveforms followed by performing a Fourier transformation. The presented absorption spectra were generating through division of the sample-containing spectra by that of a standard blank (PTFE reference). The peak positions were determined by fitting with Lorentzian functions.

### 2.1.4 Low-frequency Raman Spectroscopy

Raman data were obtained using a Coherent (Ondax) THz-Raman system, using a excitation laser centered at 785 nm (Coherent, Inc). The scattered light was analyzed using an Andor Shamrock SR-750 spectrograph with an iDus 416 CCD detector. Each Raman spectrum consisted of 300

acquisitions of 3 s exposure time windows, yielding a usable spectral range of 10 to 300  $\text{cm}^{-1}$  and a spectral resolution of 0.6  $\text{cm}^{-1}$ . Low-frequency Raman spectra were obtained using polycrystalline powder samples of TMA-Azo. Microcrystalline samples were prepared by grinding in a mortar and pestle before experiments were performed at different temperatures between 80 K and 300 K in 10 K increments using a Lake Shore Cryotronics continuous flow liquid nitrogen cryostat.

## 2.2 Theory

The solid-state DFT simulations were performed using CRYSTAL23 software package,<sup>4</sup> with Perdew-Burke-Ernzerhof density functional<sup>5</sup> and 6-311G(2d,2p) basis set.<sup>6</sup> This computational approach was used to perform all the calculations. The experimental single-crystal XRD structure (at 100K) was used as the starting point for unconstrained geometry optimizations with an energy criterion of  $\Delta E < 10^{-8}$  hartree. The low-frequency vibrational analysis was performed on the optimized structures to obtain the frequencies and normal modes. Frequencies were calculated via numerical differentiation within the harmonic approximation,<sup>7,8</sup> and IR and Raman intensities were determined analytically through the Coupled-Perturbed Kohn-Sham method.<sup>9-11</sup> The vibrational potentials were generated by extracting the mass-weighted eigenvector for the Raman active vibrational mode predicted 125.69  $\text{cm}^{-1}$  that was described in the main text (see file "eigenvector\_displacement.txt"). Subsequently, constrained volume optimizations were performed at a series of volumes (see Table 7). After complete optimization, the eigenvector from the frequency calculation was used to generate a series of structures in steps of  $0.2Q$ , where  $Q$  is the normalized vibrational eigenvector, which is normalized to the classical vibrational amplitude. Single-point energy calculations were performed to generate the potential energy curves shown in the main text.

### 3 Single-Crystal X-ray Diffraction Data

Table 1: Experimental single-crystal XRD data

|                                           |                                                               |                                                               |                                                               |                                                               |                                                               |
|-------------------------------------------|---------------------------------------------------------------|---------------------------------------------------------------|---------------------------------------------------------------|---------------------------------------------------------------|---------------------------------------------------------------|
| Compound formula                          | C <sub>29</sub> H <sub>22</sub> N <sub>8</sub> O <sub>6</sub> | C <sub>29</sub> H <sub>22</sub> N <sub>8</sub> O <sub>6</sub> | C <sub>29</sub> H <sub>22</sub> N <sub>8</sub> O <sub>6</sub> | C <sub>29</sub> H <sub>22</sub> N <sub>8</sub> O <sub>6</sub> | C <sub>29</sub> H <sub>22</sub> N <sub>8</sub> O <sub>6</sub> |
| Formula weight                            | 578.54                                                        | 578.54                                                        | 578.54                                                        | 578.54                                                        | 578.54                                                        |
| Temperature/K                             | 100.00(10)                                                    | 110.02(10)                                                    | 130.01(10)                                                    | 150.01(10)                                                    | 170.00(10)                                                    |
| Crystal system                            | Monoclinic                                                    | Monoclinic                                                    | Monoclinic                                                    | Monoclinic                                                    | Monoclinic                                                    |
| Space group                               | <i>P</i> 2 <sub>1</sub> / <i>c</i>                            |
| a (Å)                                     | 13.9468 (2)                                                   | 13.9549(2)                                                    | 13.9761(10)                                                   | 14.0001(10)                                                   | 14.0295(10)                                                   |
| b (Å)                                     | 12.3892(10)                                                   | 12.3882(10)                                                   | 12.3862(10)                                                   | 12.386(10)                                                    | 12.3839(10)                                                   |
| c (Å)                                     | 16.6087(2)                                                    | 16.6141(2)                                                    | 16.6209(2)                                                    | 16.6263(2)                                                    | 16.6344(2)                                                    |
| α (degrees)                               | 90                                                            | 90                                                            | 90                                                            | 90                                                            | 90                                                            |
| β (degrees)                               | 110.401(10)                                                   | 110.344(10)                                                   | 110.219(10)                                                   | 110.087(10)                                                   | 109.943(10)                                                   |
| γ (degrees)                               | 90                                                            | 90                                                            | 90                                                            | 90                                                            | 90                                                            |
| Volume (Å <sup>3</sup> )                  | 2689.80(6)                                                    | 2693.02(6)                                                    | 2699.95(5)                                                    | 2707.72(5)                                                    | 2716.75(5)                                                    |
| Z                                         | 4                                                             | 4                                                             | 4                                                             | 4                                                             | 4                                                             |
| ρ <sub>calc</sub> (g/cm <sup>3</sup> )    | 1.429                                                         | 1.427                                                         | 1.423                                                         | 1.419                                                         | 1.414                                                         |
| Absorption coefficient, μ/mm <sup>1</sup> | 0.867                                                         | 0.866                                                         | 0.864                                                         | 0.861                                                         | 0.858                                                         |
| F(000)                                    | 1200                                                          | 1200                                                          | 1200                                                          | 1200                                                          | 1200                                                          |
| Crystal size (mm)                         | 0.4 × 0.35 × 0.13                                             | 0.4 × 0.35 × 0.13                                             | 0.4 × 0.35 × 0.13                                             | 0.4 × 0.35 × 0.13                                             | 0.4 × 0.35 × 0.13                                             |
| Radiation Type                            | Cu K <sub>α</sub>                                             |
| Wavelength (Å)                            | 1.54184                                                       | 1.54184                                                       | 1.54184                                                       | 1.54184                                                       | 1.54184                                                       |
| Reflections collected                     | 34952                                                         | 35109                                                         | 35393                                                         | 35564                                                         | 35755                                                         |
| No. of independent reflections            | 5799                                                          | 5808                                                          | 5818                                                          | 5836                                                          | 5862                                                          |
| No. of reflections (I > 2σ (I))           | 5352                                                          | 5381                                                          | 5378                                                          | 5402                                                          | 5411                                                          |
| Data/restraints/parameter                 | 5799/0/391                                                    | 5808/0/391                                                    | 5818/0/391                                                    | 5836/0/391                                                    | 5862/360/452                                                  |
| R <sub>int</sub>                          | 0.0526                                                        | 0.0471                                                        | 0.0488                                                        | 0.0457                                                        | 0.0460                                                        |
| R1 (I > 2σ (I))                           | 0.0494                                                        | 0.0490                                                        | 0.0461                                                        | 0.0442                                                        | 0.0423                                                        |
| wR(F2) (I > 2σ (I))                       | 0.1420                                                        | 0.1376                                                        | 0.1303                                                        | 0.1247                                                        | 0.1210                                                        |
| R1 (all data)                             | 0.0521                                                        | 0.0515                                                        | 0.0488                                                        | 0.0469                                                        | 0.0450                                                        |
| wR(F2) (all data)                         | 0.1447                                                        | 0.1402                                                        | 0.1328                                                        | 0.1271                                                        | 0.1235                                                        |
| Goodness-of-fit on F2                     | 1.063                                                         | 1.047                                                         | 1.044                                                         | 1.042                                                         | 1.049                                                         |
| CCDC deposition number                    | 2377598                                                       | 2377599                                                       | 2377600                                                       | 2377601                                                       | 2377602                                                       |

**Table 2: Experimental hydrogen bond distances from the single-crystal XRD data.**

|       | D-H...A            | d(D-H) | d(H...A) | d(D...A)   | <(DHA) |
|-------|--------------------|--------|----------|------------|--------|
| 100 K | O(6)-H(6)...N(8)#1 | 0.84   | 1.77     | 2.6064(16) | 176.1  |
|       | O(1)-H(1)...N(1)   | 0.84   | 1.83     | 2.6660(17) | 172.4  |
|       | O(3)-H(3)...N(5)   | 0.84   | 1.76     | 2.6007(16) | 176    |
| 110 K | O(6)-H(6)...N(8)#1 | 0.84   | 1.77     | 2.6068(16) | 173.7  |
|       | O(1)-H(1)...N(1)   | 0.84   | 1.83     | 2.6671(16) | 174.3  |
|       | O(3)-H(3)...N(5)   | 0.84   | 1.76     | 2.6015(16) | 175.6  |
| 130 K | O(6)-H(6)...N(8)#1 | 0.84   | 1.77     | 2.6082(15) | 175.9  |
|       | O(1)-H(1)...N(1)   | 0.84   | 1.83     | 2.6688(16) | 175.6  |
|       | O(3)-H(3)...N(5)   | 0.84   | 1.76     | 2.6021(15) | 174.4  |
| 150 K | O(6)-H(6)...N(8)#1 | 0.84   | 1.77     | 2.6098(14) | 175.5  |
|       | O(1)-H(1)...N(1)   | 0.84   | 1.83     | 2.6697(15) | 174.6  |
|       | O(3)-H(3)...N(5)   | 0.84   | 1.76     | 2.6030(14) | 175.9  |
| 170 K | O(6)-H(6)...N(8)#1 | 0.84   | 1.77     | 2.6107(14) | 174.1  |
|       | O(1)-H(1)...N(1)   | 0.84   | 1.83     | 2.6728(14) | 175.9  |
|       | O(3)-H(3)...N(5A)  | 0.84   | 1.77     | 2.6052(18) | 175.5  |
|       | O(3)-H(3)...N(5B)  | 0.84   | 1.76     | 2.602(16)  | 176.6  |

Symmetry transformations used to generate equivalent atoms:

#1  $-x+1, y+3/2, -z+1/2$

## 4 Peak Fitting Data

### 4.1 Low-Frequency Raman Data

Table 3: Center frequency of absorption features from the low-frequency Raman spectra.

| Temp | Frequency (cm <sup>-1</sup> ) |      |       |       |       |       |       |       |       |       |
|------|-------------------------------|------|-------|-------|-------|-------|-------|-------|-------|-------|
| 90   | 87.5                          | 97.5 | 105.7 | 122.7 | 136.7 | 154.8 | 186.0 | 198.0 | 215.5 | 225.5 |
| 100  | 87.5                          | 97.2 | 105.7 | 122.6 | 137.0 | 155.0 | 185.0 | 198.0 | 215.1 | 225.5 |
| 110  | 87.5                          | 96.9 | 105.7 | 122.5 | 135.5 | 155.0 | 185.0 | 198.0 | 215.0 | 225.5 |
| 120  | 87.1                          | 96.6 | 105.7 | 122.2 | 136.0 | 154.0 | 185.0 | 198.0 | 216.1 | 225.3 |
| 130  | 87.2                          | 96.3 | 105.4 | 121.9 | 135.0 | 154.3 | 185.0 | 198.0 | 215.1 | 225.5 |
| 140  | 86.6                          | 95.9 | 105.3 | 121.4 | 135.0 | 154.0 | 184.8 | 198.0 | 214.8 | 224.9 |
| 150  | 86.6                          | 95.6 | 105.3 | 120.8 | 135.0 | 154.0 | 184.0 | 198.0 | 214.8 | 224.9 |
| 160  | 86.6                          | 95.0 | 104.7 | 120.4 | 134.5 | 154.0 | 184.0 | 198.0 | 214.8 | 224.9 |
| 170  | 86.2                          | 94.3 | 104.0 | 120.1 | 135.0 | 154.0 | 184.0 | 198.0 | 214.1 | 224.2 |
| 180  | 86.1                          | 94.1 | 103.0 | 119.7 | 135.0 | 154.0 | 184.0 | 198.0 | 214.1 | 223.5 |
| 190  | 85.3                          | 93.5 | 103.5 | 119.4 | 135.0 | 154.0 | 184.0 | 198.0 | 213.6 | 223.0 |
| 200  | 85.2                          | 93.3 | 103.5 | 119.0 | 134.5 | 152.6 | 183.2 | 197.8 | 213.3 | 223.0 |
| 210  | 85.0                          | 93.0 | 103.5 | 118.8 | 134.5 | 152.6 | 183.2 | 197.8 | 213.3 | 223.0 |
| 220  | 84.5                          | 92.7 | 103.0 | 118.7 | 134.2 | 152.7 | 183.2 | 197.8 | 213.3 | 223.0 |
| 230  | 84.5                          | 92.7 | 103.0 | 118.5 | 134.2 | 152.7 | 183.2 | 197.8 | 212.7 | 223.0 |
| 240  | 84.4                          | 92.6 | 103.0 | 118.3 | 134.0 | 152.9 | 183.2 | 197.8 | 212.7 | 222.4 |
| 250  | 84.0                          | 92.3 | 103.0 | 118.0 | 134.0 | 152.9 | 183.2 | 197.8 | 212.7 | 222.4 |
| 260  | 83.7                          | 92.0 | 103.0 | 117.8 | 134.0 | 152.9 | 183.2 | 197.8 | 212.7 | 222.4 |
| 270  | 83.7                          | 92.0 | 102.0 | 117.1 | 134.0 | 155.0 | 183.2 | 197.8 | 212.5 | 222.2 |
| 280  | 83.6                          | 92.0 | 102.0 | 116.6 | 134.0 | 153.1 | 183.2 | 197.8 | 212.3 | 222.0 |
| 290  | 83.2                          | 91.7 | 102.0 | 116.2 | 134.0 | 154.5 | 183.2 | 197.8 | 212.1 | 221.7 |
| 300  | 83.2                          | 91.7 | 102.0 | 115.3 | 134.0 | 154.3 | 183.2 | 197.8 | 211.8 | 221.3 |



**Table 4: Full-width at half-maxima of the experimental absorption features from the low-frequency Raman spectra.**

| Temp | Peak Full-width at Half-maxima (cm <sup>-1</sup> ) |     |     |      |     |      |      |      |     |     |
|------|----------------------------------------------------|-----|-----|------|-----|------|------|------|-----|-----|
| 90   | 4.8                                                | 5.7 | 6.2 | 6.5  | 4.0 | 5.5  | 8.0  | 6.0  | 5.0 | 4.3 |
| 100  | 4.8                                                | 5.8 | 6.0 | 6.9  | 3.0 | 4.5  | 6.0  | 6.0  | 4.5 | 4.3 |
| 110  | 4.8                                                | 6.0 | 6.0 | 6.9  | 3.0 | 4.5  | 6.0  | 6.2  | 4.5 | 4.3 |
| 120  | 4.8                                                | 6.0 | 6.0 | 6.9  | 3.0 | 4.5  | 6.0  | 6.2  | 4.5 | 4.3 |
| 130  | 4.8                                                | 6.0 | 6.0 | 7.1  | 3.0 | 4.5  | 6.0  | 6.2  | 4.5 | 4.3 |
| 140  | 4.9                                                | 6.3 | 6.3 | 7.4  | 3.0 | 4.7  | 6.2  | 6.2  | 4.7 | 4.4 |
| 150  | 4.9                                                | 6.3 | 6.6 | 7.2  | 4.2 | 7.0  | 9.0  | 6.2  | 4.7 | 4.4 |
| 160  | 5.0                                                | 6.4 | 6.5 | 7.4  | 4.5 | 7.0  | 9.0  | 6.2  | 4.7 | 4.4 |
| 170  | 5.0                                                | 6.6 | 6.3 | 8.1  | 4.0 | 7.0  | 9.0  | 6.2  | 4.7 | 4.4 |
| 180  | 5.0                                                | 6.6 | 6.5 | 8.5  | 4.0 | 7.0  | 9.0  | 6.2  | 5.3 | 4.4 |
| 190  | 5.4                                                | 7.3 | 6.5 | 8.6  | 4.5 | 7.0  | 9.0  | 6.2  | 5.2 | 5.6 |
| 200  | 5.8                                                | 7.5 | 6.7 | 9.0  | 4.0 | 7.2  | 9.0  | 6.2  | 5.3 | 5.6 |
| 210  | 5.8                                                | 7.5 | 6.8 | 9.2  | 4.0 | 7.2  | 9.0  | 6.2  | 5.3 | 5.6 |
| 220  | 5.8                                                | 7.7 | 7.2 | 9.6  | 5.0 | 7.3  | 9.0  | 6.2  | 5.8 | 6.1 |
| 230  | 6.1                                                | 7.8 | 7.2 | 10.3 | 5.0 | 7.3  | 9.0  | 6.2  | 6.0 | 6.7 |
| 240  | 7.0                                                | 8.7 | 8.2 | 10.8 | 6.0 | 10.0 | 9.0  | 6.2  | 6.8 | 7.2 |
| 250  | 7.5                                                | 8.7 | 8.2 | 11.2 | 6.0 | 10.0 | 9.0  | 6.2  | 6.8 | 7.2 |
| 260  | 7.5                                                | 8.7 | 8.2 | 12.0 | 6.0 | 10.0 | 9.0  | 6.8  | 6.8 | 7.2 |
| 270  | 7.5                                                | 8.7 | 8.2 | 12.5 | 8.0 | 9.0  | 11.0 | 6.9  | 7.0 | 7.2 |
| 280  | 7.5                                                | 8.7 | 8.2 | 13.0 | 8.0 | 9.3  | 11.0 | 6.9  | 7.0 | 7.2 |
| 290  | 7.5                                                | 8.7 | 8.2 | 14.2 | 8.0 | 9.2  | 15.0 | 8.0  | 7.0 | 7.2 |
| 300  | 8.0                                                | 8.7 | 8.2 | 15.1 | 8.0 | 9.2  | 15.0 | 10.0 | 7.0 | 9.0 |

## 4.2 Terahertz Time-domain Spectroscopy

**Table 5: Center frequency of absorption features from the terahertz time-domain spectroscopy data.**

| Temperature |      | Center Frequency ( $\text{cm}^{-1}$ ) |      |      |      |      |      |      |       |       |       |       |       |
|-------------|------|---------------------------------------|------|------|------|------|------|------|-------|-------|-------|-------|-------|
| 80          | 36.9 | 41.6                                  | 47.8 | 58.9 | 63.1 | 69.4 | 75.9 | 87.0 | 100.6 | 105.1 | 117.4 | 124.2 | 129.7 |
| 150         | 36.5 | 40.8                                  | 47.6 | 61.4 | 61.4 | 69.8 | 74.1 | 86.0 | 99.6  | 103.0 | 117.1 | 123.0 | 128.0 |
| 170         | 36.3 | 40.7                                  | 47.4 | 61.2 | 61.2 | 73.1 | 73.1 | 85.4 | 98.9  | 102.4 | 117.1 | 122.6 | 128.5 |
| 190         | 36.2 | 40.3                                  | 47.7 | 60.3 | 60.3 | 72.8 | 72.8 | 85.2 | 99.4  | 102.6 | 114.9 | 121.7 | 127.5 |
| 230         | 35.7 | 39.8                                  | 47.1 | 60.2 | 60.2 | 72.0 | 72.0 | 83.9 | 100.2 | -     | -     | 120.4 | 127.9 |
| 250         | 35.5 | 39.3                                  | 47.5 | 58.3 | 58.3 | 71.4 | 71.4 | 80.9 | 98.2  | -     | -     | 119.6 | 125.8 |
| 290         | 35.0 | -                                     | 46.5 | 57.4 | 57.4 | 70.2 | 70.2 | -    | 94.3  | -     | -     | 117.1 | -     |

**Table 6: Full-width at half-maxima of absorption features from the terahertz time-domain spectroscopy data.**

| Temperature |     | Full-width at Half-maxima ( $\text{cm}^{-1}$ ) |     |     |     |     |     |     |     |      |     |     |     |
|-------------|-----|------------------------------------------------|-----|-----|-----|-----|-----|-----|-----|------|-----|-----|-----|
| 80          | 1.2 | 1.4                                            | 1.7 | 2.2 | 1.6 | 1.4 | 1.8 | 1.9 | 3.1 | 1.6  | 2.6 | 3.0 | 1.6 |
| 150         | 1.6 | 1.6                                            | 1.5 | 3.0 | 1.6 | 1.7 | 3.2 | 2.4 | 2.1 | 22.6 | 2.6 | 2.8 | 1.2 |
| 170         | 1.7 | 1.6                                            | 1.7 | 2.4 | 2.4 | 3.9 | 3.9 | 1.7 | 2.9 | 2.6  | 3.1 | 2.7 | 1.7 |
| 190         | 1.6 | 1.6                                            | 2.3 | 2.7 | 2.7 | 3.6 | 3.6 | 1.9 | 2.7 | 2.2  | 3.0 | 2.8 | 2.4 |
| 230         | 1.8 | 1.9                                            | 2.8 | 2.2 | 2.2 | 3.5 | 3.5 | 1.6 | 2.8 | -    | -   | 3.5 | 2.2 |
| 250         | 1.9 | 1.7                                            | 3.4 | 3.8 | 3.8 | 3.4 | 3.4 | 7.4 | 2.6 | -    | -   | 3.2 | 3.9 |
| 290         | 2.1 | -                                              | 3.6 | 3.6 | 3.6 | 3.0 | 3.0 | -   | 3.5 | -    | -   | 4.7 | -   |

## 5 Structure Information for Constrained Volume Optimizations

Table 7: Structures obtained from the constrained volume optimizations (CIF files available online.)

| Volume ( $\text{\AA}^3$ ) | a ( $\text{\AA}$ ) | b ( $\text{\AA}$ ) | c ( $\text{\AA}$ ) | $\alpha$ (deg) | $\beta$ (deg) | $\gamma$ (deg) |
|---------------------------|--------------------|--------------------|--------------------|----------------|---------------|----------------|
| 2490.8974                 | 13.7794            | 12.3943            | 15.9747            | 90.0000        | 114.0772      | 90.0000        |
| 2647.1565                 | 14.0682            | 12.4256            | 16.2783            | 90.0000        | 111.5208      | 90.0000        |
| 2660.6181                 | 14.1507            | 12.4149            | 16.2629            | 90.0000        | 111.3695      | 90.0000        |
| 2696.4546                 | 14.3976            | 12.3948            | 16.4330            | 90.0000        | 109.9572      | 90.0000        |

## 6 Calculated Transition Frequencies and Intensities

### 6.1 Infrared

Table 8: DFT-predicted IR-active Vibrational Mode Frequency ( $\text{cm}^{-1}$ ) and intensity ( $\text{km mol}^{-1}$ )

|          |       |          |        |          |        |          |        |
|----------|-------|----------|--------|----------|--------|----------|--------|
| 20.7012  | 0.11  | 107.7903 | 1.86   | 231.8338 | 3.5    | 396.3117 | 152.62 |
| 36.9104  | 1.82  | 110.5966 | 23.52  | 235.9362 | 23.93  | 399.7179 | 41.59  |
| 38.664   | 10.13 | 112.5395 | 3.09   | 242.7563 | 3.57   | 414.5489 | 10.46  |
| 40.3511  | 0.4   | 113.1805 | 0.04   | 244.9248 | 17.33  | 458.7262 | 38.32  |
| 43.6786  | 0.32  | 117.4987 | 16.73  | 247.1793 | 189.97 | 459.2145 | 10.64  |
| 45.7745  | 0.81  | 121.0914 | 20.17  | 252.0508 | 10.46  | 469.5152 | 0.15   |
| 46.4804  | 2.38  | 121.2092 | 0.04   | 256.2609 | 82.8   | 470.2053 | 1.5    |
| 51.6877  | 2.44  | 122.0916 | 1.92   | 257.7572 | 35.2   | 498.9945 | 0.02   |
| 54.1604  | 0.21  | 127.5554 | 0.06   | 262.6187 | 14.9   | 501.1257 | 1.4    |
| 60.4999  | 0.49  | 128.3452 | 18.4   | 267.355  | 5.73   | 503.3336 | 1.87   |
| 61.047   | 9.03  | 132.9525 | 0.19   | 300.7239 | 69.3   | 506.0122 | 11.67  |
| 65.3856  | 0.58  | 133.324  | 0.66   | 302.3227 | 82.89  | 507.1559 | 131.23 |
| 66.0095  | 0.84  | 136.9742 | 7.11   | 307.5623 | 136.34 | 510.2054 | 18     |
| 67.774   | 0.4   | 137.3337 | 3.28   | 308.29   | 3.07   | 516.8027 | 153.58 |
| 68.5222  | 0.67  | 139.6573 | 1.14   | 311.2858 | 158.16 | 520.7357 | 25.53  |
| 72.5498  | 0.11  | 141.797  | 3.95   | 313.5481 | 70.5   | 524.7412 | 252.34 |
| 74.2011  | 3.72  | 143.8898 | 0.03   | 317.2277 | 73.83  | 524.944  | 18.06  |
| 77.3232  | 4.2   | 144.7754 | 6.83   | 319.0041 | 35.97  | 525.2094 | 38.54  |
| 81.8529  | 1.97  | 146.8807 | 0.62   | 319.8044 | 335.6  | 527.5671 | 233.41 |
| 85.4899  | 9.63  | 151.5662 | 17.98  | 339.3886 | 16.46  | 541.7823 | 0.8    |
| 85.6671  | 0.03  | 153.3559 | 6.73   | 362.1084 | 14.71  | 542.8103 | 532.58 |
| 88.0633  | 0.58  | 159.0889 | 0.34   | 362.1481 | 31.3   | 562.0341 | 903.73 |
| 90.181   | 8.62  | 164.5525 | 36.98  | 376.592  | 13.87  | 568.6249 | 285.98 |
| 92.0902  | 1.36  | 165.3313 | 5.38   | 376.856  | 4.7    | 569.6058 | 0.86   |
| 94.0985  | 3.03  | 170.3459 | 16.99  | 383.5483 | 38.2   | 569.8693 | 441.32 |
| 97.0243  | 5.48  | 199.3464 | 5.09   | 383.944  | 59.35  | 570.7562 | 5.98   |
| 97.5334  | 3.34  | 203.1089 | 5.92   | 386.9001 | 240.91 | 574.8187 | 24.96  |
| 99.9947  | 4.96  | 207.1176 | 61.76  | 388.7708 | 3.92   | 591.9929 | 81.02  |
| 102.4677 | 5.06  | 214.5934 | 198.42 | 392.8496 | 2.51   | 595.2835 | 701.88 |
| 104.4351 | 0.51  | 220.452  | 2.37   | 393.2191 | 59.5   | 649.5134 | 0.97   |
| 107.7583 | 0.59  | 224.6567 | 115.89 | 393.8188 | 0.16   | 651.2143 | 1.18   |

DFT-predicted IR-active Vibrational Mode Frequency (cm<sup>-1</sup>) and intensity (km mol<sup>-1</sup>) (continued).

|          |       |          |        |           |         |           |         |
|----------|-------|----------|--------|-----------|---------|-----------|---------|
| 652.2838 | 3.94  | 779.381  | 14.5   | 949.0833  | 16.45   | 1032.8199 | 2.46    |
| 653.3424 | 3     | 822.5646 | 12.01  | 949.5148  | 5.75    | 1033.4902 | 7.4     |
| 654.9098 | 0.06  | 822.5969 | 10.19  | 954.7656  | 7.1     | 1034.5188 | 1118.04 |
| 656.4304 | 8.91  | 831.641  | 0.52   | 956.3102  | 1.12    | 1034.826  | 215.92  |
| 658.2701 | 0.86  | 835.2322 | 27.22  | 958.5153  | 4.16    | 1043.2894 | 293.59  |
| 659.5354 | 17.93 | 841.899  | 13.76  | 958.5359  | 0.48    | 1043.8667 | 88.89   |
| 668.6977 | 1.05  | 842.9966 | 760.44 | 960.8241  | 9.55    | 1046.4656 | 21.2    |
| 668.8001 | 12.26 | 845.5233 | 76.02  | 963.5723  | 5.14    | 1048.7021 | 40.94   |
| 678.7632 | 95.43 | 847.3282 | 3.87   | 969.5882  | 3.1     | 1049.6268 | 27.79   |
| 679.6126 | 0.4   | 847.6821 | 184.51 | 969.624   | 4.79    | 1056.7342 | 217.98  |
| 686.3387 | 57.53 | 848.2502 | 0.14   | 973.7815  | 7.54    | 1058.5022 | 57.84   |
| 691.65   | 5.93  | 851.3917 | 625.59 | 975.5431  | 6.04    | 1061.2318 | 79.16   |
| 698.4608 | 50.72 | 852.8341 | 137.79 | 981.5855  | 7.7     | 1062.4315 | 10.5    |
| 700.1137 | 34.39 | 854.6904 | 46.1   | 981.7911  | 8.93    | 1063.164  | 28.01   |
| 702.8602 | 38.36 | 855.2575 | 8.85   | 986.6253  | 12.87   | 1068.5768 | 808.74  |
| 709.8377 | 5.28  | 857.4786 | 14.27  | 987.2467  | 1       | 1068.6646 | 19.14   |
| 720.7382 | 0.02  | 858.5728 | 2.31   | 990.4572  | 0.17    | 1070.4885 | 19.98   |
| 722.3442 | 9.18  | 864.7961 | 0.14   | 990.8497  | 18.01   | 1078.0688 | 373.93  |
| 723.9821 | 1.01  | 866.0024 | 47.94  | 991.5868  | 0.83    | 1078.4097 | 0.46    |
| 725.4422 | 0.85  | 872.6739 | 77.36  | 992.9649  | 5.1     | 1154.9161 | 68.54   |
| 735.4717 | 426.9 | 875.4949 | 14.21  | 993.2946  | 20.95   | 1155.2861 | 521.95  |
| 738.0467 | 16.2  | 912.5308 | 5.24   | 994.4777  | 12.19   | 1159.8241 | 41.24   |
| 739.031  | 49.31 | 912.7544 | 35.02  | 999.4884  | 1.35    | 1160.4728 | 36.13   |
| 741.2891 | 36.33 | 913.143  | 51.29  | 1000.0096 | 2.01    | 1164.7482 | 8.09    |
| 743.3504 | 6.74  | 913.3775 | 2.01   | 1008.3848 | 60.19   | 1166.1894 | 512.91  |
| 746.0011 | 58.28 | 931.894  | 3.64   | 1008.8809 | 12.09   | 1172.1463 | 574.16  |
| 765.987  | 2.54  | 932.3108 | 5.84   | 1011.6377 | 60.57   | 1172.7353 | 208.47  |
| 766.2071 | 0.43  | 932.3946 | 3.49   | 1012.6898 | 0.02    | 1184.9641 | 48.27   |
| 777.8262 | 2.42  | 933.4274 | 0.52   | 1013.4275 | 1.46    | 1185.1962 | 4.6     |
| 777.9948 | 9.91  | 934.3282 | 39.35  | 1019.9043 | 3.31    | 1186.7914 | 17.14   |
| 778.5676 | 14.74 | 934.7065 | 6.02   | 1029.9419 | 1109.98 | 1187.7585 | 90.27   |

DFT-predicted IR-active Vibrational Mode Frequency ( $\text{cm}^{-1}$ ) and intensity ( $\text{km mol}^{-1}$ ) (continued).

|           |           |           |           |           |           |           |           |
|-----------|-----------|-----------|-----------|-----------|-----------|-----------|-----------|
| Frequency | Intensity | Frequency | Intensity | Frequency | Intensity | Frequency | Intensity |
| 1189.0467 | 280.67    | 1405.0907 | 13.48     | 1590.9967 | 70.26     | 3129.8247 | 29.19     |
| 1189.8573 | 2.86      | 1405.1213 | 151.56    | 1591.5695 | 8.3       | 3129.8542 | 160.73    |
| 1190.6702 | 359.98    | 1407.9375 | 28.75     | 1592.9323 | 9.32      | 3130.1413 | 63.61     |
| 1190.8105 | 643.72    | 1408.3325 | 514.04    | 1593.7673 | 36.11     | 3130.3126 | 10.64     |
| 1195.6488 | 389.79    | 1408.7728 | 430.01    | 1601.8179 | 418.61    | 3139.0045 | 60.09     |
| 1196.4099 | 398.49    | 1409.4217 | 124.64    | 1602.1644 | 1.41      | 3139.0383 | 1.76      |
| 1197.0961 | 39.83     | 1411.7243 | 3.09      | 1604.4307 | 4.5       | 3148.5944 | 4.49      |
| 1197.8312 | 35.73     | 1411.8765 | 333.78    | 1604.5906 | 5.16      | 3148.638  | 0.11      |
| 1211.067  | 2.4       | 1414.6216 | 392.57    | 1612.5583 | 3274.8    | 3150.5555 | 175.4     |
| 1211.0994 | 12.19     | 1417.4033 | 28.2      | 1614.4626 | 229.88    | 3150.6253 | 14.65     |
| 1247.4801 | 76.65     | 1429.2596 | 132.96    | 1614.956  | 46.14     | 3153.89   | 10.53     |
| 1247.7041 | 0.15      | 1429.5199 | 470.03    | 1616.1583 | 359.69    | 3153.9301 | 19.84     |
| 1248.5526 | 89.14     | 1438.3113 | 66.72     | 1617.8727 | 567.48    | 3159.7365 | 4.77      |
| 1249.9652 | 24.11     | 1439.9834 | 355.15    | 1619.5396 | 0.09      | 3159.7762 | 9.71      |
| 1271.179  | 866.41    | 1446.0375 | 20.73     | 1623.309  | 59.88     | 3163.4333 | 31.6      |
| 1271.2085 | 427.99    | 1446.8477 | 0.04      | 1624.0135 | 13.27     | 3163.5004 | 5.04      |
| 1277.7377 | 1699.66   | 1453.5471 | 47.43     | 1668.4832 | 4761.68   | 3166.9423 | 2.01      |
| 1278.6542 | 1.37      | 1454.5202 | 0.83      | 1671.9861 | 292.65    | 3167.0653 | 1.33      |
| 1282.786  | 51.33     | 1468.7429 | 10.81     | 1685.2745 | 179.47    | 3170.1584 | 45.38     |
| 1283.2837 | 1205.82   | 1469.5019 | 201.03    | 1685.6062 | 3798.37   | 3170.2093 | 3.37      |
| 1288.3685 | 41.36     | 1472.2735 | 6.93      | 1694.4436 | 909.38    | 3173.2683 | 40.06     |
| 1289.192  | 993.95    | 1476.2278 | 1.9       | 1696.9875 | 356.54    | 3173.2729 | 0.97      |
| 1291.4898 | 1348.07   | 1514.7923 | 0.19      | 1941.6069 | 50037.88  | 3179.4382 | 4.7       |
| 1298.6372 | 101.13    | 1515.3249 | 236.86    | 1954.7125 | 5638.73   | 3179.5854 | 5.81      |
| 1306.4812 | 10332.18  | 1516.0595 | 3.07      | 1977.7559 | 22854.79  | 3181.8228 | 10.1      |
| 1307.376  | 627.8     | 1517.4997 | 1.86      | 1991.0166 | 2188.73   | 3181.9294 | 14.31     |
| 1338.6886 | 4.18      | 1528.6767 | 17.88     | 2187.127  | 32537.32  | 3185.7401 | 72.66     |
| 1338.7509 | 37.64     | 1528.731  | 16.12     | 2209.4022 | 5.2       | 3185.8379 | 17.49     |
| 1342.3944 | 4.85      | 1533.1054 | 188.61    | 3089.005  | 260.09    | 3189.6281 | 26.13     |
| 1342.6144 | 1.07      | 1534.8787 | 24.64     | 3089.0352 | 13.12     | 3189.7337 | 3.31      |
| 1344.7491 | 118.4     | 1539.1651 | 3.6       | 3095.1015 | 1.76      |           |           |
| 1346.6763 | 33.5      | 1539.9112 | 39.67     | 3095.2081 | 3.71      |           |           |
| 1347.6345 | 205.26    | 1577.5564 | 54.67     | 3100.8793 | 238.98    |           |           |
| 1349.4645 | 7.74      | 1578.0243 | 60.57     | 3101.1334 | 0.44      |           |           |
| 1369.4413 | 58.84     | 1585.5089 | 493.44    | 3114.6376 | 0.93      |           |           |
| 1371.7885 | 206.58    | 1586.6622 | 193.9     | 3114.8975 | 3.48      |           |           |

## 6.2 Raman

Table 9: DFT-Predicted Raman Active Vibrational Frequency ( $\text{cm}^{-1}$ ) and response.

| Frequency | Polycrystalline Response |                 |             | Single-Crystalline Response |       |      |       |       |       |
|-----------|--------------------------|-----------------|-------------|-----------------------------|-------|------|-------|-------|-------|
|           | Total                    | $I_{\parallel}$ | $I_{\perp}$ | xx                          | xy    | xz   | yy    | yz    | zz    |
| 20.63     | 24.36                    | 13.92           | 10.44       | 0                           | 10.93 | 0    | 0     | 9.45  | 0     |
| 20.72     | 19.48                    | 11.21           | 8.27        | 0.45                        | 0     | 0.47 | 21.23 | 0     | 9.89  |
| 24.91     | 8.04                     | 5               | 3.04        | 1.59                        | 0     | 4.49 | 1.79  | 0     | 0.61  |
| 33.86     | 26.09                    | 15.14           | 10.95       | 18.51                       | 0     | 2.48 | 2.1   | 0     | 17.83 |
| 37.67     | 1.31                     | 0.75            | 0.56        | 0                           | 0.07  | 0    | 0     | 1.02  | 0     |
| 40.28     | 43.99                    | 25.47           | 18.53       | 23.33                       | 0     | 0.35 | 0.28  | 0     | 48.94 |
| 40.80     | 13.59                    | 7.76            | 5.82        | 0                           | 11.18 | 0    | 0     | 0.19  | 0     |
| 41.30     | 21.78                    | 12.66           | 9.12        | 14.41                       | 0     | 2.07 | 16.52 | 0     | 1.12  |
| 42.67     | 2.7                      | 1.54            | 1.16        | 0                           | 1.47  | 0    | 0     | 0.79  | 0     |
| 46.64     | 31.13                    | 17.79           | 13.34       | 0                           | 9.36  | 0    | 0     | 16.69 | 0     |
| 47.72     | 16.75                    | 11.38           | 5.37        | 2.41                        | 0     | 0.5  | 0.51  | 0     | 22.01 |
| 51.06     | 3.56                     | 2.11            | 1.44        | 1.45                        | 0     | 1.59 | 0.92  | 0     | 0.32  |
| 53.01     | 16.05                    | 9.17            | 6.88        | 0                           | 13.3  | 0    | 0     | 0.13  | 0     |
| 55.75     | 5.57                     | 3.18            | 2.39        | 0                           | 4.63  | 0    | 0     | 0.03  | 0     |
| 61.31     | 23.98                    | 13.71           | 10.27       | 21.52                       | 0     | 3.34 | 1.17  | 0     | 10.75 |
| 61.40     | 5.02                     | 2.87            | 2.15        | 0                           | 1.41  | 0    | 0     | 2.79  | 0     |
| 62.57     | 17.19                    | 10.26           | 6.94        | 0.94                        | 0     | 5.35 | 15.46 | 0     | 1.16  |
| 63.27     | 28.28                    | 16.16           | 12.12       | 0                           | 2.51  | 0    | 0     | 21.16 | 0     |
| 65.07     | 14.98                    | 8.57            | 6.41        | 2.72                        | 0     | 1.36 | 14.15 | 0     | 5.49  |
| 68.23     | 0.19                     | 0.11            | 0.08        | 0                           | 0.05  | 0    | 0     | 0.12  | 0     |
| 74.08     | 2.72                     | 1.55            | 1.17        | 0                           | 0.81  | 0    | 0     | 1.46  | 0     |
| 74.44     | 13.75                    | 8.47            | 5.28        | 4.39                        | 0     | 3.02 | 6.28  | 0     | 5.58  |
| 75.84     | 1.17                     | 0.91            | 0.26        | 1.48                        | 0     | 0.02 | 0.03  | 0     | 0.14  |
| 76.70     | 3.98                     | 2.27            | 1.7         | 0                           | 0.34  | 0    | 0     | 2.99  | 0     |
| 79.36     | 6.93                     | 5.99            | 0.94        | 5.75                        | 0     | 0.67 | 2.07  | 0     | 0.06  |
| 83.53     | 2.87                     | 1.64            | 1.23        | 0                           | 0.82  | 0    | 0     | 1.58  | 0     |
| 86.62     | 3.45                     | 2.06            | 1.39        | 0.02                        | 0     | 0.14 | 1.12  | 0     | 4.25  |
| 88.25     | 7.85                     | 4.59            | 3.26        | 5.3                         | 0     | 1.18 | 0.65  | 0     | 4.7   |
| 88.70     | 12.94                    | 7.39            | 5.55        | 0                           | 4.98  | 0    | 0     | 5.85  | 0     |
| 90.45     | 41.82                    | 23.89           | 17.92       | 0                           | 28.21 | 0    | 0     | 6.78  | 0     |





| Frequency | Polycrystalline Response |                 |             | Single-Crystalline Response |       |      |       |       |       |
|-----------|--------------------------|-----------------|-------------|-----------------------------|-------|------|-------|-------|-------|
|           | Total                    | $I_{\parallel}$ | $I_{\perp}$ | xx                          | xy    | xz   | yy    | yz    | zz    |
| 91.97     | 4.62                     | 2.86            | 1.76        | 5.1                         | 0     | 0.98 | 0.21  | 0     | 0.21  |
| 92.85     | 6.72                     | 3.84            | 2.88        | 0                           | 0.69  | 0    | 0     | 4.94  | 0     |
| 93.65     | 56.69                    | 32.39           | 24.3        | 0                           | 15.51 | 0    | 0     | 31.93 | 0     |
| 94.39     | 9.78                     | 5.61            | 4.18        | 0.54                        | 0     | 0.65 | 6.23  | 0     | 8.28  |
| 95.28     | 9.72                     | 5.55            | 4.17        | 0                           | 1.36  | 0    | 0     | 6.77  | 0     |
| 98.25     | 8.9                      | 5.09            | 3.81        | 2.26                        | 0     | 5.46 | 1.52  | 0     | 0.18  |
| 100.19    | 7.05                     | 4.03            | 3.02        | 0                           | 3.2   | 0    | 0     | 2.7   | 0     |
| 101.23    | 14.35                    | 8.6             | 5.75        | 0.67                        | 0     | 3.1  | 1.57  | 0     | 15.1  |
| 102.31    | 7.98                     | 4.9             | 3.09        | 2.6                         | 0     | 4.94 | 0.26  | 0     | 0.22  |
| 104.20    | 9.91                     | 5.66            | 4.25        | 0                           | 1.48  | 0    | 0     | 6.82  | 0     |
| 109.18    | 3.58                     | 2.05            | 1.54        | 0                           | 1.8   | 0    | 0     | 1.2   | 0     |
| 109.93    | 11.69                    | 6.72            | 4.97        | 14.34                       | 0     | 0    | 2.94  | 0     | 2.23  |
| 111.07    | 24.1                     | 15.1            | 9           | 12.25                       | 0     | 1.48 | 15.11 | 0     | 8.47  |
| 111.37    | 6.69                     | 3.82            | 2.87        | 0                           | 3.01  | 0    | 0     | 2.59  | 0     |
| 114.25    | 3.94                     | 2.25            | 1.69        | 0                           | 0.02  | 0    | 0     | 3.28  | 0     |
| 115.49    | 72.41                    | 41.38           | 31.03       | 0                           | 34.21 | 0    | 0     | 26.38 | 0     |
| 119.14    | 13.64                    | 8.08            | 5.56        | 13.03                       | 0     | 2.68 | 0     | 0     | 4.1   |
| 120.81    | 3.73                     | 2.13            | 1.6         | 0                           | 0.01  | 0    | 0     | 3.11  | 0     |
| 122.89    | 45.52                    | 26.14           | 19.38       | 41.22                       | 0     | 3.93 | 0.05  | 0     | 26.9  |
| 123.69    | 8.71                     | 5.41            | 3.31        | 0.15                        | 0     | 5.57 | 2.75  | 0     | 0.03  |
| 125.70    | 86.14                    | 49.22           | 36.92       | 0                           | 28.88 | 0    | 0     | 43.2  | 0     |
| 125.93    | 44.32                    | 25.32           | 18.99       | 0                           | 4.31  | 0    | 0     | 32.78 | 0     |
| 127.02    | 32.89                    | 19.02           | 13.87       | 26.87                       | 0     | 2.72 | 0.72  | 0     | 21.74 |
| 131.99    | 129.21                   | 73.83           | 55.37       | 0                           | 15.38 | 0    | 0     | 92.74 | 0     |
| 132.21    | 28.99                    | 17.27           | 11.73       | 21.43                       | 0     | 0.51 | 5.09  | 0     | 20.16 |
| 137.20    | 11.36                    | 7.46            | 3.91        | 0.87                        | 0     | 7.43 | 1.91  | 0     | 0.24  |
| 142.71    | 18.6                     | 13.09           | 5.52        | 4.58                        | 0     | 0.35 | 6.8   | 0     | 16.17 |
| 147.14    | 19.82                    | 11.32           | 8.49        | 0                           | 10.38 | 0    | 0     | 6.2   | 0     |
| 150.51    | 8.97                     | 5.13            | 3.85        | 0                           | 4.25  | 0    | 0     | 3.25  | 0     |
| 151.55    | 7.17                     | 4.98            | 2.19        | 0                           | 0     | 1.32 | 0.05  | 0     | 8.26  |
| 178.78    | 0.28                     | 0.16            | 0.12        | 0.04                        | 0     | 0.07 | 0.1   | 0     | 0.18  |
| 182.63    | 0.2                      | 0.11            | 0.09        | 0                           | 0.16  | 0    | 0     | 0     | 0     |

| Frequency | Polycrystalline Response |                 |             | Single-Crystalline Response |      |      |      |      |      |
|-----------|--------------------------|-----------------|-------------|-----------------------------|------|------|------|------|------|
|           | Total                    | $I_{\parallel}$ | $I_{\perp}$ | xx                          | xy   | xz   | yy   | yz   | zz   |
| 185.71    | 0.12                     | 0.07            | 0.05        | 0                           | 0.1  | 0    | 0    | 0    | 0    |
| 194.31    | 2.45                     | 1.4             | 1.04        | 1.95                        | 0    | 0    | 2.07 | 0    | 0.06 |
| 200.38    | 2.99                     | 1.71            | 1.28        | 0                           | 0.39 | 0    | 0    | 2.12 | 0    |
| 202.55    | 5.07                     | 2.97            | 2.11        | 1.27                        | 0    | 2.52 | 1.86 | 0    | 0.25 |
| 209.26    | 13.45                    | 8.45            | 5           | 7.04                        | 0    | 0.1  | 6.79 | 0    | 7.58 |
| 214.63    | 2.88                     | 1.65            | 1.24        | 0                           | 1.55 | 0    | 0    | 0.86 | 0    |
| 218.81    | 8.29                     | 4.74            | 3.55        | 0                           | 2.86 | 0    | 0    | 4.08 | 0    |
| 219.82    | 6.57                     | 3.92            | 2.65        | 7.59                        | 0    | 0.31 | 2.59 | 0    | 0    |
| 225.61    | 3.18                     | 2.04            | 1.14        | 0.25                        | 0    | 0.08 | 0.08 | 0    | 4.57 |
| 226.41    | 0.95                     | 0.54            | 0.41        | 0                           | 0.35 | 0    | 0    | 0.45 | 0    |
| 227.66    | 2.14                     | 1.51            | 0.63        | 0.44                        | 0    | 0.44 | 1.72 | 0    | 0.19 |
| 232.95    | 3.46                     | 1.98            | 1.48        | 0                           | 1.34 | 0    | 0    | 1.55 | 0    |
| 235.88    | 4.21                     | 3.12            | 1.09        | 0.06                        | 0    | 0.7  | 0.33 | 0    | 4.4  |
| 236.95    | 0.33                     | 0.19            | 0.14        | 0                           | 0.13 | 0    | 0    | 0.15 | 0    |
| 270.24    | 0.75                     | 0.43            | 0.32        | 0                           | 0.18 | 0    | 0    | 0.45 | 0    |
| 273.17    | 1.47                     | 1               | 0.47        | 1.11                        | 0    | 0.38 | 0.15 | 0    | 0.24 |
| 276.10    | 3.68                     | 3.15            | 0.53        | 0.65                        | 0    | 0.01 | 4.25 | 0    | 0    |
| 276.26    | 0.44                     | 0.25            | 0.19        | 0                           | 0.02 | 0    | 0    | 0.35 | 0    |
| 279.96    | 1.35                     | 0.77            | 0.58        | 1                           | 0    | 0.15 | 0.96 | 0    | 0    |
| 282.02    | 0.31                     | 0.18            | 0.13        | 0                           | 0.15 | 0    | 0    | 0.12 | 0    |
| 284.01    | 2.55                     | 1.73            | 0.82        | 0.4                         | 0    | 0.21 | 2.97 | 0    | 0.16 |
| 286.09    | 0.97                     | 0.56            | 0.42        | 0                           | 0.48 | 0    | 0    | 0.34 | 0    |
| 287.91    | 0.19                     | 0.16            | 0.03        | 0.02                        | 0    | 0.01 | 0    | 0    | 0.22 |
| 305.17    | 1.22                     | 0.7             | 0.52        | 0                           | 1    | 0    | 0    | 0.01 | 0    |
| 325.51    | 10.59                    | 9.3             | 1.29        | 4.7                         | 0    | 2.04 | 0.84 | 0    | 4.3  |
| 325.88    | 0.6                      | 0.34            | 0.26        | 0                           | 0.25 | 0    | 0    | 0.25 | 0    |
| 338.68    | 5.29                     | 4.76            | 0.53        | 4.06                        | 0    | 0.13 | 2.46 | 0    | 0.04 |
| 341.10    | 0.47                     | 0.27            | 0.2         | 0                           | 0.15 | 0    | 0    | 0.25 | 0    |
| 343.32    | 2.82                     | 2.79            | 0.03        | 1.36                        | 0    | 0.04 | 1.03 | 0    | 0.87 |
| 345.78    | 3.9                      | 3.75            | 0.15        | 1.89                        | 0    | 0.26 | 1.32 | 0    | 1.02 |
| 347.01    | 1.14                     | 0.65            | 0.49        | 0                           | 0.39 | 0    | 0    | 0.56 | 0    |
| 349.05    | 1.09                     | 0.62            | 0.47        | 0                           | 0.32 | 0    | 0    | 0.6  | 0    |
| 353.94    | 1.91                     | 1.13            | 0.78        | 1.74                        | 0    | 0.55 | 0.08 | 0    | 0.22 |
| 354.31    | 0.31                     | 0.17            | 0.13        | 0                           | 0.01 | 0    | 0    | 0.24 | 0    |
| 355.54    | 1.16                     | 0.66            | 0.5         | 0                           | 0.55 | 0    | 0    | 0.43 | 0    |
| 357.21    | 0.15                     | 0.08            | 0.06        | 0                           | 0.08 | 0    | 0    | 0.05 | 0    |
| 359.99    | 0.42                     | 0.26            | 0.17        | 0.13                        | 0    | 0.01 | 0.26 | 0    | 0.28 |
| 371.85    | 5.55                     | 4.08            | 1.47        | 0.28                        | 0    | 0.37 | 6.81 | 0    | 0.41 |

| Frequency | Polycrystalline Response |                 |             | Single-Crystalline Response |      |      |       |      |      |
|-----------|--------------------------|-----------------|-------------|-----------------------------|------|------|-------|------|------|
|           | Total                    | $I_{\parallel}$ | $I_{\perp}$ | xx                          | xy   | xz   | yy    | yz   | zz   |
| 411.98    | 0.32                     | 0.19            | 0.13        | 0.15                        | 0    | 0    | 0.15  | 0    | 0.22 |
| 412.06    | 0.31                     | 0.18            | 0.13        | 0                           | 0.22 | 0    | 0     | 0.05 | 0    |
| 422.95    | 0.1                      | 0.06            | 0.04        | 0                           | 0.01 | 0    | 0     | 0.07 | 0    |
| 423.12    | 0.76                     | 0.68            | 0.08        | 0.28                        | 0    | 0.04 | 0.62  | 0    | 0.01 |
| 448.77    | 1.92                     | 1.1             | 0.82        | 0                           | 0.34 | 0    | 0     | 1.27 | 0    |
| 450.67    | 1.99                     | 1.27            | 0.72        | 0.48                        | 0    | 0    | 0.01  | 0    | 2.69 |
| 451.44    | 2.96                     | 1.72            | 1.25        | 2.98                        | 0    | 0    | 0.01  | 0    | 1.94 |
| 454.37    | 0.16                     | 0.09            | 0.07        | 0                           | 0.13 | 0    | 0     | 0    | 0    |
| 454.66    | 0.77                     | 0.66            | 0.11        | 0.61                        | 0    | 0    | 0.01  | 0    | 0.41 |
| 458.85    | 0.61                     | 0.35            | 0.26        | 0                           | 0.04 | 0    | 0     | 0.47 | 0    |
| 464.12    | 0.3                      | 0.17            | 0.13        | 0                           | 0    | 0    | 0     | 0.25 | 0    |
| 467.99    | 2.25                     | 1.96            | 0.3         | 1.5                         | 0    | 0.35 | 0.71  | 0    | 0.07 |
| 471.49    | 0.22                     | 0.2             | 0.02        | 0.23                        | 0    | 0    | 0.04  | 0    | 0.01 |
| 471.90    | 0.1                      | 0.06            | 0.04        | 0                           | 0.05 | 0    | 0     | 0.04 | 0    |
| 472.56    | 0.1                      | 0.08            | 0.02        | 0                           | 0    | 0.01 | 0.07  | 0    | 0.04 |
| 474.97    | 0.51                     | 0.29            | 0.22        | 0                           | 0    | 0    | 0     | 0.43 | 0    |
| 487.64    | 2.35                     | 2               | 0.35        | 0.6                         | 0    | 0.54 | 0.14  | 0    | 1.35 |
| 488.37    | 0.11                     | 0.06            | 0.05        | 0                           | 0.09 | 0    | 0     | 0    | 0    |
| 506.00    | 0.2                      | 0.14            | 0.07        | 0.04                        | 0    | 0.03 | 0.19  | 0    | 0.02 |
| 511.88    | 0.07                     | 0.04            | 0.03        | 0                           | 0.01 | 0    | 0     | 0.05 | 0    |
| 512.91    | 0.72                     | 0.41            | 0.31        | 0                           | 0    | 0.44 | 0.23  | 0    | 0.09 |
| 514.08    | 0.02                     | 0.01            | 0.01        | 0                           | 0    | 0    | 0     | 0.02 | 0    |
| 515.93    | 2.43                     | 1.88            | 0.55        | 0                           | 0    | 0    | 3.45  | 0    | 0.03 |
| 517.31    | 1.07                     | 0.61            | 0.46        | 0                           | 0.63 | 0    | 0     | 0.26 | 0    |
| 532.72    | 0.06                     | 0.03            | 0.03        | 0                           | 0.02 | 0    | 0     | 0.03 | 0    |
| 535.21    | 1.51                     | 1.43            | 0.08        | 0.2                         | 0    | 0.05 | 1.13  | 0    | 0.42 |
| 585.87    | 0.24                     | 0.14            | 0.1         | 0                           | 0.1  | 0    | 0     | 0.1  | 0    |
| 586.99    | 24.66                    | 15.44           | 9.22        | 4.2                         | 0    | 1.76 | 31.89 | 0    | 0.07 |
| 587.37    | 3.04                     | 2.25            | 0.79        | 1.28                        | 0    | 0.86 | 0.08  | 0    | 1.42 |
| 587.88    | 20.34                    | 11.62           | 8.72        | 0                           | 8.08 | 0    | 0     | 8.94 | 0    |
| 588.67    | 8.22                     | 5.02            | 3.2         | 2.4                         | 0    | 0.41 | 10.15 | 0    | 0    |
| 590.38    | 0.12                     | 0.07            | 0.05        | 0                           | 0.08 | 0    | 0     | 0.02 | 0    |
| 592.64    | 3.77                     | 2.16            | 1.62        | 0                           | 1.59 | 0    | 0     | 1.57 | 0    |
| 593.44    | 0.61                     | 0.35            | 0.26        | 0.03                        | 0    | 0.33 | 0.26  | 0    | 0.07 |
| 601.18    | 0.09                     | 0.05            | 0.04        | 0                           | 0.06 | 0    | 0     | 0.01 | 0    |
| 602.01    | 0.31                     | 0.18            | 0.13        | 0.31                        | 0    | 0.07 | 0.01  | 0    | 0.05 |
| 610.56    | 9.29                     | 5.56            | 3.73        | 2.43                        | 0    | 1.31 | 10.17 | 0    | 0.04 |
| 610.81    | 3.59                     | 2.05            | 1.54        | 0                           | 1.49 | 0    | 0     | 1.52 | 0    |
| 618.82    | 0.69                     | 0.4             | 0.3         | 0                           | 0.26 | 0    | 0     | 0.32 | 0    |

| Frequency | Polycrystalline Response |                 |             | Single-Crystalline Response |      |      |       |      |      |
|-----------|--------------------------|-----------------|-------------|-----------------------------|------|------|-------|------|------|
|           | Total                    | $I_{\parallel}$ | $I_{\perp}$ | xx                          | xy   | xz   | yy    | yz   | zz   |
| 622.95    | 6.32                     | 4.07            | 2.25        | 5.66                        | 0    | 1.95 | 0.43  | 0    | 0.05 |
| 630.18    | 0.02                     | 0.01            | 0.01        | 0                           | 0.01 | 0    | 0     | 0    | 0    |
| 630.95    | 4.31                     | 2.51            | 1.8         | 2.69                        | 0    | 0.98 | 2.27  | 0    | 0.25 |
| 631.98    | 3.87                     | 2.29            | 1.58        | 2.24                        | 0    | 0.21 | 3.57  | 0    | 0.16 |
| 638.47    | 0.43                     | 0.25            | 0.18        | 0                           | 0.05 | 0    | 0     | 0.31 | 0    |
| 650.79    | 0.21                     | 0.13            | 0.08        | 0                           | 0    | 0    | 0.28  | 0    | 0.04 |
| 652.40    | 0.64                     | 0.37            | 0.27        | 0                           | 0.47 | 0    | 0     | 0.06 | 0    |
| 653.42    | 4.3                      | 3.71            | 0.59        | 1.14                        | 0    | 0.22 | 0.01  | 0    | 4.13 |
| 653.70    | 0.21                     | 0.12            | 0.09        | 0                           | 0.14 | 0    | 0     | 0.03 | 0    |
| 663.03    | 1.15                     | 0.84            | 0.32        | 1.4                         | 0    | 0.12 | 0.04  | 0    | 0.05 |
| 663.36    | 2.28                     | 1.3             | 0.98        | 0                           | 0.89 | 0    | 0     | 1.02 | 0    |
| 665.36    | 0.55                     | 0.31            | 0.24        | 0                           | 0.01 | 0    | 0     | 0.45 | 0    |
| 666.69    | 0.64                     | 0.36            | 0.27        | 0.11                        | 0    | 0.17 | 0.52  | 0    | 0.1  |
| 667.78    | 9.8                      | 8.1             | 1.7         | 0.27                        | 0    | 0.27 | 12.41 | 0    | 0.24 |
| 670.37    | 0.71                     | 0.4             | 0.3         | 0                           | 0.45 | 0    | 0     | 0.15 | 0    |
| 689.82    | 9.61                     | 9.22            | 0.39        | 4.82                        | 0    | 0.66 | 2.59  | 0    | 2.99 |
| 689.92    | 0.36                     | 0.21            | 0.15        | 0                           | 0.01 | 0    | 0     | 0.29 | 0    |
| 699.65    | 2                        | 1.14            | 0.86        | 0                           | 0.41 | 0    | 0     | 1.27 | 0    |
| 699.94    | 0.49                     | 0.29            | 0.21        | 0                           | 0    | 0.27 | 0.19  | 0    | 0.08 |
| 700.77    | 0.2                      | 0.11            | 0.09        | 0                           | 0.01 | 0    | 0     | 0.15 | 0    |
| 700.86    | 2.6                      | 1.49            | 1.11        | 0.92                        | 0    | 0.22 | 0.29  | 0    | 2.68 |
| 740.18    | 2.45                     | 1.4             | 1.05        | 0                           | 0.81 | 0    | 0     | 1.23 | 0    |
| 740.22    | 2.61                     | 1.62            | 0.98        | 0                           | 0    | 0.62 | 0.32  | 0    | 2.65 |
| 742.54    | 7.2                      | 4.48            | 2.73        | 3.31                        | 0    | 0.33 | 0.88  | 0    | 6.78 |
| 744.79    | 7.97                     | 4.55            | 3.42        | 0                           | 1.11 | 0    | 0     | 5.56 | 0    |
| 756.65    | 0.99                     | 0.87            | 0.12        | 1.04                        | 0    | 0.05 | 0.08  | 0    | 0.08 |
| 759.98    | 1.79                     | 1.02            | 0.77        | 0                           | 0.38 | 0    | 0     | 1.11 | 0    |
| 762.00    | 0.16                     | 0.09            | 0.07        | 0                           | 0.04 | 0    | 0     | 0.1  | 0    |
| 763.83    | 0.21                     | 0.16            | 0.06        | 0                           | 0    | 0.01 | 0     | 0    | 0.28 |
| 764.48    | 0.42                     | 0.24            | 0.18        | 0                           | 0.35 | 0    | 0     | 0    | 0    |
| 765.13    | 2.05                     | 1.81            | 0.24        | 0.01                        | 0    | 0.07 | 1.81  | 0    | 0.72 |
| 766.48    | 0.3                      | 0.17            | 0.13        | 0                           | 0.22 | 0    | 0     | 0.03 | 0    |
| 768.12    | 2.22                     | 1.31            | 0.91        | 0.44                        | 0    | 0.15 | 1.39  | 0    | 1.55 |
| 768.73    | 2.76                     | 1.58            | 1.18        | 0                           | 2.25 | 0    | 0     | 0.06 | 0    |
| 772.44    | 0.63                     | 0.37            | 0.27        | 0.22                        | 0    | 0.18 | 0.35  | 0    | 0.12 |
| 775.83    | 1.89                     | 1.66            | 0.23        | 0.41                        | 0    | 0.44 | 0.52  | 0    | 0.67 |
| 775.85    | 1.22                     | 0.7             | 0.52        | 0                           | 0.03 | 0    | 0     | 0.99 | 0    |
| 780.78    | 0.77                     | 0.44            | 0.33        | 0                           | 0.21 | 0    | 0     | 0.43 | 0    |
| 782.47    | 2.26                     | 1.78            | 0.48        | 2.2                         | 0    | 0.06 | 0.76  | 0    | 0.12 |

| Frequency | Polycrystalline Response |                 |             | Single-Crystalline Response |      |       |        |      |       |
|-----------|--------------------------|-----------------|-------------|-----------------------------|------|-------|--------|------|-------|
|           | Total                    | $I_{\parallel}$ | $I_{\perp}$ | xx                          | xy   | xz    | yy     | yz   | zz    |
| 784.88    | 0.58                     | 0.33            | 0.25        | 0.21                        | 0    | 0.34  | 0.05   | 0    | 0.02  |
| 784.92    | 1.47                     | 0.84            | 0.63        | 0                           | 0.27 | 0     | 0      | 0.96 | 0     |
| 821.25    | 2.54                     | 1.45            | 1.09        | 0                           | 1.48 | 0     | 0      | 0.64 | 0     |
| 821.33    | 0.22                     | 0.14            | 0.08        | 0.08                        | 0    | 0     | 0.04   | 0    | 0.21  |
| 821.76    | 3.17                     | 1.82            | 1.35        | 0.59                        | 0    | 1.15  | 2.2    | 0    | 0.21  |
| 821.80    | 0.5                      | 0.28            | 0.21        | 0                           | 0.41 | 0     | 0      | 0    | 0     |
| 838.85    | 2.06                     | 1.18            | 0.88        | 0                           | 0.15 | 0     | 0      | 1.57 | 0     |
| 839.06    | 2.85                     | 1.66            | 1.19        | 0.23                        | 0    | 1.14  | 1.15   | 0    | 1.06  |
| 839.15    | 2.36                     | 1.35            | 1.01        | 0                           | 1.98 | 0     | 0      | 0    | 0     |
| 840.06    | 7.05                     | 5.6             | 1.45        | 4.14                        | 0    | 1.65  | 0      | 0    | 2.5   |
| 840.72    | 1.59                     | 0.98            | 0.6         | 0.63                        | 0    | 0.16  | 1.47   | 0    | 0.14  |
| 840.75    | 0.37                     | 0.21            | 0.16        | 0                           | 0.25 | 0     | 0      | 0.06 | 0     |
| 854.21    | 1.6                      | 1.13            | 0.47        | 0.31                        | 0    | 0.14  | 1.24   | 0    | 0.6   |
| 854.77    | 0.06                     | 0.03            | 0.02        | 0                           | 0.04 | 0     | 0      | 0    | 0     |
| 860.89    | 0.81                     | 0.67            | 0.15        | 0.06                        | 0    | 0     | 1.06   | 0    | 0     |
| 861.25    | 0.12                     | 0.07            | 0.05        | 0                           | 0    | 0     | 0      | 0.1  | 0     |
| 861.83    | 0.41                     | 0.23            | 0.18        | 0                           | 0.23 | 0     | 0      | 0.11 | 0     |
| 862.82    | 0.35                     | 0.21            | 0.15        | 0.18                        | 0    | 0.06  | 0.01   | 0    | 0.28  |
| 866.51    | 2.78                     | 2.15            | 0.63        | 3.34                        | 0    | 0.05  | 0.44   | 0    | 0.12  |
| 867.78    | 2.13                     | 1.22            | 0.91        | 0                           | 1.71 | 0     | 0      | 0.07 | 0     |
| 873.61    | 1.03                     | 0.61            | 0.42        | 0.53                        | 0    | 0     | 0.35   | 0    | 0.81  |
| 873.63    | 0.47                     | 0.27            | 0.2         | 0                           | 0.03 | 0     | 0      | 0.36 | 0     |
| 875.64    | 0.05                     | 0.03            | 0.02        | 0                           | 0    | 0     | 0      | 0.04 | 0     |
| 877.21    | 4.4                      | 3.25            | 1.15        | 0                           | 0    | 0.65  | 5.19   | 0    | 0.01  |
| 884.66    | 7.58                     | 6.66            | 0.92        | 1.27                        | 0    | 1.57  | 1.56   | 0    | 3.98  |
| 884.78    | 0.54                     | 0.31            | 0.23        | 0                           | 0.22 | 0     | 0      | 0.23 | 0     |
| 886.70    | 0.71                     | 0.4             | 0.3         | 0                           | 0.59 | 0     | 0      | 0    | 0     |
| 888.49    | 2.93                     | 2.7             | 0.23        | 0.7                         | 0    | 0.01  | 2.84   | 0    | 0.14  |
| 891.68    | 30.77                    | 26.71           | 4.06        | 15.3                        | 0    | 6.97  | 3.82   | 0    | 7.76  |
| 892.22    | 1.77                     | 1.01            | 0.76        | 0                           | 1.22 | 0     | 0      | 0.27 | 0     |
| 892.32    | 48.9                     | 44.18           | 4.72        | 17.37                       | 0    | 8.96  | 10.7   | 0    | 16.82 |
| 893.68    | 0.28                     | 0.16            | 0.12        | 0                           | 0.18 | 0     | 0      | 0.05 | 0     |
| 894.64    | 12.87                    | 12.66           | 0.21        | 3.17                        | 0    | 0.27  | 5.38   | 0    | 6.22  |
| 895.50    | 1.22                     | 0.7             | 0.52        | 0                           | 1.02 | 0     | 0      | 0    | 0     |
| 899.58    | 3.09                     | 2.69            | 0.4         | 2.68                        | 0    | 0.17  | 0.01   | 0    | 1.07  |
| 900.06    | 1.66                     | 0.95            | 0.71        | 0                           | 1.09 | 0     | 0      | 0.29 | 0     |
| 905.67    | 15.06                    | 8.61            | 6.45        | 0                           | 8.56 | 0     | 0      | 4.04 | 0     |
| 906.83    | 116.98                   | 104.43          | 12.55       | 13.48                       | 0    | 2.84  | 125.36 | 0    | 7.22  |
| 910.39    | 6.27                     | 3.59            | 2.69        | 0                           | 1.83 | 0     | 0      | 3.42 | 0     |
| 910.66    | 52.46                    | 45.33           | 7.13        | 6.21                        | 0    | 0.95  | 60.82  | 0    | 0.87  |
| 910.93    | 1.33                     | 0.76            | 0.57        | 0                           | 0.93 | 0     | 0      | 0.18 | 0     |
| 917.61    | 98.86                    | 91.28           | 7.58        | 37.58                       | 0    | 14.05 | 21.49  | 0    | 37.51 |

| Frequency | Polycrystalline Response |                 |             | Single-Crystalline Response |       |       |        |       |        |
|-----------|--------------------------|-----------------|-------------|-----------------------------|-------|-------|--------|-------|--------|
|           | Total                    | $I_{\parallel}$ | $I_{\perp}$ | xx                          | xy    | xz    | yy     | yz    | zz     |
| 927.61    | 0.26                     | 0.15            | 0.11        | 0                           | 0.1   | 0     | 0      | 0.12  | 0      |
| 928.41    | 4.05                     | 2.71            | 1.34        | 0.26                        | 0     | 2.1   | 0      | 0     | 1.84   |
| 929.38    | 1.67                     | 0.95            | 0.71        | 0                           | 1.19  | 0     | 0      | 0.21  | 0      |
| 931.00    | 9.51                     | 9.02            | 0.49        | 4.76                        | 0     | 0.8   | 3.44   | 0     | 1.92   |
| 931.72    | 0.29                     | 0.16            | 0.12        | 0                           | 0.03  | 0     | 0      | 0.21  | 0      |
| 937.33    | 17.67                    | 17.33           | 0.35        | 7.39                        | 0     | 0.53  | 8.12   | 0     | 4.54   |
| 937.80    | 0.15                     | 0.08            | 0.06        | 0                           | 0.06  | 0     | 0      | 0.06  | 0      |
| 941.54    | 5.15                     | 3.7             | 1.45        | 1.11                        | 0     | 2.59  | 0.08   | 0     | 1.36   |
| 945.40    | 0.94                     | 0.54            | 0.4         | 0                           | 0.7   | 0     | 0      | 0.09  | 0      |
| 945.48    | 7.69                     | 6.15            | 1.53        | 0.32                        | 0     | 0     | 10.48  | 0     | 0      |
| 948.86    | 8.42                     | 7.3             | 1.12        | 0.14                        | 0     | 0     | 10.07  | 0     | 0.95   |
| 949.86    | 0.11                     | 0.06            | 0.05        | 0                           | 0.09  | 0     | 0      | 0     | 0      |
| 955.00    | 0.58                     | 0.33            | 0.25        | 0                           | 0.3   | 0     | 0      | 0.18  | 0      |
| 955.96    | 2.93                     | 2.63            | 0.29        | 0.06                        | 0     | 0.05  | 2.8    | 0     | 0.81   |
| 956.51    | 2.37                     | 1.71            | 0.66        | 0.81                        | 0     | 0.92  | 0.02   | 0     | 0.89   |
| 961.16    | 0.21                     | 0.13            | 0.08        | 0.13                        | 0     | 0.1   | 0      | 0     | 0      |
| 961.71    | 1.49                     | 0.85            | 0.64        | 0                           | 0.65  | 0     | 0      | 0.6   | 0      |
| 963.08    | 0.02                     | 0.01            | 0.01        | 0                           | 0.01  | 0     | 0      | 0     | 0      |
| 970.39    | 3.84                     | 2.48            | 1.36        | 1.06                        | 0     | 1.46  | 0.55   | 0     | 1.55   |
| 970.44    | 0.58                     | 0.33            | 0.25        | 0                           | 0.36  | 0     | 0      | 0.12  | 0      |
| 1042.18   | 106.96                   | 61.12           | 45.84       | 0                           | 67.59 | 0     | 0      | 21.92 | 0      |
| 1042.61   | 947.82                   | 859.74          | 88.08       | 154.5                       | 0     | 48.94 | 880.73 | 0     | 80.45  |
| 1043.76   | 74.24                    | 42.42           | 31.82       | 0                           | 43.07 | 0     | 0      | 19.05 | 0      |
| 1044.07   | 195.38                   | 112.14          | 83.25       | 23.46                       | 0     | 40.78 | 178.79 | 0     | 42.61  |
| 1047.21   | 958.75                   | 818.4           | 140.35      | 376.03                      | 0     | 244   | 88.42  | 0     | 335.16 |
| 1050.25   | 44.09                    | 25.2            | 18.9        | 0                           | 19.99 | 0     | 0      | 16.9  | 0      |
| 1056.31   | 7.76                     | 4.43            | 3.33        | 0                           | 3.33  | 0     | 0      | 3.16  | 0      |
| 1056.58   | 8.53                     | 5.82            | 2.71        | 0.22                        | 0     | 0.9   | 10.35  | 0     | 0.8    |
| 1066.47   | 8.05                     | 6.94            | 1.1         | 1.88                        | 0     | 2.14  | 2.52   | 0     | 2.04   |
| 1066.89   | 8.69                     | 4.97            | 3.73        | 0                           | 5.45  | 0     | 0      | 1.83  | 0      |
| 1067.99   | 0.18                     | 0.1             | 0.08        | 0                           | 0.15  | 0     | 0      | 0.01  | 0      |
| 1068.23   | 148.35                   | 132.65          | 15.7        | 42.55                       | 0     | 30.54 | 48.61  | 0     | 39.94  |
| 1069.91   | 236.34                   | 189.32          | 47.02       | 4                           | 0     | 0.2   | 326.49 | 0     | 1.06   |
| 1070.77   | 42.46                    | 24.26           | 18.2        | 0                           | 27.16 | 0     | 0      | 8.37  | 0      |
| 1071.99   | 116.58                   | 66.62           | 49.96       | 0                           | 75.77 | 0     | 0      | 21.79 | 0      |
| 1073.00   | 129.58                   | 112.62          | 16.96       | 12.27                       | 0     | 0.99  | 153.9  | 0     | 3.52   |
| 1076.94   | 26.97                    | 22.43           | 4.54        | 10.08                       | 0     | 8.55  | 4.85   | 0     | 4.88   |
| 1077.51   | 0.33                     | 0.19            | 0.14        | 0                           | 0.01  | 0     | 0      | 0.26  | 0      |
| 1088.07   | 10.45                    | 5.97            | 4.48        | 0                           | 5.47  | 0     | 0      | 3.27  | 0      |
| 1088.44   | 111.26                   | 90.39           | 20.86       | 48.3                        | 0     | 31.21 | 1.93   | 0     | 42.14  |
| 1090.59   | 47.25                    | 33.22           | 14.02       | 17.74                       | 0     | 16.82 | 1.88   | 0     | 18.53  |

| Frequency | Polycrystalline Response |                 |             | Single-Crystalline Response |       |       |        |       |       |
|-----------|--------------------------|-----------------|-------------|-----------------------------|-------|-------|--------|-------|-------|
|           | Total                    | $I_{\parallel}$ | $I_{\perp}$ | xx                          | xy    | xz    | yy     | yz    | zz    |
| 1091.19   | 1.24                     | 0.71            | 0.53        | 0                           | 0.45  | 0     | 0      | 0.58  | 0     |
| 1123.04   | 5.27                     | 3.01            | 2.26        | 0                           | 0.72  | 0     | 0      | 3.69  | 0     |
| 1123.11   | 1.24                     | 0.86            | 0.38        | 0.07                        | 0     | 0.39  | 0.19   | 0     | 0.87  |
| 1124.91   | 0.39                     | 0.22            | 0.17        | 0                           | 0.03  | 0     | 0      | 0.29  | 0     |
| 1125.71   | 5.34                     | 4.53            | 0.81        | 2.23                        | 0     | 1.1   | 0.13   | 0     | 2.65  |
| 1144.12   | 2.66                     | 2.28            | 0.38        | 2.11                        | 0     | 0.26  | 0.94   | 0     | 0     |
| 1144.78   | 2.82                     | 1.61            | 1.21        | 0                           | 1.31  | 0     | 0      | 1.06  | 0     |
| 1149.64   | 96.14                    | 85.17           | 10.97       | 11.72                       | 0     | 0.74  | 108.68 | 0     | 3.59  |
| 1151.57   | 51.96                    | 29.69           | 22.27       | 0                           | 31.87 | 0     | 0      | 11.6  | 0     |
| 1155.22   | 33.81                    | 30.81           | 3           | 10.04                       | 0     | 2.33  | 26.47  | 0     | 1.95  |
| 1155.73   | 0.91                     | 0.52            | 0.39        | 0                           | 0.15  | 0     | 0      | 0.61  | 0     |
| 1160.04   | 0.13                     | 0.07            | 0.06        | 0                           | 0.11  | 0     | 0      | 0     | 0     |
| 1161.81   | 98.44                    | 78.14           | 20.3        | 47.74                       | 0     | 29.84 | 0.88   | 0     | 30.8  |
| 1162.01   | 5.75                     | 5.54            | 0.21        | 2.03                        | 0     | 0.35  | 2.79   | 0     | 1.46  |
| 1169.22   | 0.94                     | 0.53            | 0.4         | 0                           | 0.1   | 0     | 0      | 0.68  | 0     |
| 1178.30   | 13.21                    | 8.13            | 5.08        | 3.72                        | 0     | 3.92  | 4.37   | 0     | 5.49  |
| 1178.34   | 3.43                     | 1.96            | 1.47        | 0                           | 2.26  | 0     | 0      | 0.61  | 0     |
| 1204.43   | 2                        | 1.53            | 0.47        | 0.92                        | 0     | 0.73  | 0.5    | 0     | 0.01  |
| 1204.65   | 7.86                     | 4.49            | 3.37        | 0                           | 2.26  | 0     | 0      | 4.32  | 0     |
| 1208.00   | 39.41                    | 22.52           | 16.89       | 0                           | 18.22 | 0     | 0      | 14.76 | 0     |
| 1208.55   | 8.23                     | 4.71            | 3.52        | 0.01                        | 0     | 2.37  | 5.22   | 0     | 3.79  |
| 1210.88   | 6.56                     | 3.75            | 2.81        | 0                           | 1.36  | 0     | 0      | 4.14  | 0     |
| 1211.85   | 62.49                    | 47.77           | 14.72       | 0.22                        | 0     | 0.02  | 89.26  | 0     | 0.93  |
| 1213.63   | 42.81                    | 34.94           | 7.86        | 0.18                        | 0     | 0.68  | 55.94  | 0     | 1.86  |
| 1215.02   | 1.7                      | 0.97            | 0.73        | 0                           | 1.02  | 0     | 0      | 0.41  | 0     |
| 1232.32   | 53.24                    | 46.73           | 6.51        | 22.78                       | 0     | 12.08 | 11.84  | 0     | 11.21 |
| 1233.39   | 4.04                     | 2.31            | 1.73        | 0                           | 0.01  | 0     | 0      | 3.37  | 0     |
| 1263.67   | 0.25                     | 0.14            | 0.1         | 0.1                         | 0     | 0.03  | 0.06   | 0     | 0.18  |
| 1263.98   | 3.4                      | 1.94            | 1.46        | 0                           | 1.73  | 0     | 0      | 1.11  | 0     |
| 1267.28   | 1.14                     | 0.65            | 0.49        | 0                           | 0.95  | 0     | 0      | 0     | 0     |
| 1267.69   | 0.64                     | 0.5             | 0.14        | 0.11                        | 0     | 0     | 0.78   | 0     | 0.03  |
| 1267.78   | 16.3                     | 9.32            | 6.99        | 0                           | 9.3   | 0     | 0      | 4.35  | 0     |
| 1268.46   | 11.67                    | 9.44            | 2.22        | 8.07                        | 0     | 2.92  | 0.22   | 0     | 2.15  |
| 1270.37   | 0.79                     | 0.45            | 0.34        | 0                           | 0.01  | 0     | 0      | 0.65  | 0     |
| 1270.40   | 47.46                    | 37.22           | 10.24       | 21.42                       | 0     | 14.68 | 0.15   | 0     | 16.67 |
| 1273.56   | 50.13                    | 40.61           | 9.53        | 30.18                       | 0     | 12.27 | 0.31   | 0     | 14.87 |
| 1275.43   | 0.59                     | 0.34            | 0.25        | 0                           | 0.09  | 0     | 0      | 0.41  | 0     |
| 1285.64   | 6.35                     | 3.63            | 2.72        | 0                           | 2.83  | 0     | 0      | 2.49  | 0     |
| 1285.77   | 12.34                    | 11.2            | 1.14        | 5.15                        | 0     | 1.95  | 4.96   | 0     | 1.78  |
| 1294.01   | 134.14                   | 107.06          | 27.08       | 1.91                        | 0     | 0.05  | 186.28 | 0     | 0.58  |
| 1295.48   | 1.19                     | 0.68            | 0.51        | 0                           | 0.88  | 0     | 0      | 0.11  | 0     |

| Frequency | Polycrystalline |        |        | Single-Crystalline |        |        |        |       |        |
|-----------|-----------------|--------|--------|--------------------|--------|--------|--------|-------|--------|
|           | Total           | l_par  | l_perp | xx                 | xy     | xz     | yy     | yz    | zz     |
| 1301.62   | 182.21          | 104.12 | 78.09  | 0                  | 113.39 | 0      | 0      | 39.08 | 0      |
| 1302.23   | 538.93          | 483.51 | 55.43  | 77.24              | 0      | 33.72  | 507.8  | 0     | 43.8   |
| 1308.17   | 47.54           | 27.16  | 20.37  | 0                  | 20.45  | 0      | 0      | 19.33 | 0      |
| 1309.71   | 373.72          | 258.87 | 114.85 | 145.84             | 0      | 127.07 | 24.58  | 0     | 147.81 |
| 1322.08   | 3.02            | 1.72   | 1.29   | 0                  | 0.97   | 0      | 0      | 1.55  | 0      |
| 1322.30   | 3.09            | 2.57   | 0.51   | 1.09               | 0      | 0.02   | 3.05   | 0     | 0.04   |
| 1324.91   | 0.2             | 0.11   | 0.08   | 0                  | 0.09   | 0      | 0      | 0.07  | 0      |
| 1328.78   | 35.52           | 30.81  | 4.7    | 16.4               | 0      | 8.36   | 5.06   | 0     | 8.94   |
| 1364.17   | 1000            | 823    | 177    | 435.47             | 0      | 289.99 | 45.01  | 0     | 318.39 |
| 1364.19   | 5.42            | 3.1    | 2.32   | 0                  | 0.1    | 0      | 0      | 4.43  | 0      |
| 1364.58   | 356.68          | 203.81 | 152.86 | 0                  | 204.15 | 0      | 0      | 94.31 | 0      |
| 1366.12   | 686.36          | 515.68 | 170.68 | 0.19               | 0      | 1.89   | 1000   | 0     | 0.05   |
| 1376.03   | 139.28          | 112.33 | 26.95  | 58.15              | 0      | 43.7   | 4.22   | 0     | 44.98  |
| 1376.86   | 20.64           | 11.79  | 8.85   | 0                  | 7.31   | 0      | 0      | 9.96  | 0      |
| 1380.07   | 15.07           | 13.03  | 2.04   | 1.37               | 0      | 0.62   | 16.89  | 0     | 0.55   |
| 1381.55   | 8.4             | 4.8    | 3.6    | 0                  | 5.33   | 0      | 0      | 1.7   | 0      |
| 1386.13   | 25.7            | 14.69  | 11.02  | 0                  | 15.79  | 0      | 0      | 5.72  | 0      |
| 1386.91   | 67.95           | 54.3   | 13.65  | 0.18               | 0      | 0      | 94.09  | 0     | 1.31   |
| 1419.77   | 5.03            | 2.88   | 2.16   | 0                  | 1.27   | 0      | 0      | 2.94  | 0      |
| 1420.26   | 4.07            | 2.99   | 1.08   | 1.77               | 0      | 1.8    | 0.04   | 0     | 0.63   |
| 1427.32   | 1.83            | 1.22   | 0.61   | 0.53               | 0      | 0.4    | 1.15   | 0     | 0.37   |
| 1428.06   | 0.44            | 0.25   | 0.19   | 0                  | 0.1    | 0      | 0      | 0.27  | 0      |
| 1431.05   | 7.87            | 5.7    | 2.17   | 2.02               | 0      | 3.49   | 0      | 0     | 2.76   |
| 1431.54   | 3.25            | 1.86   | 1.39   | 0                  | 1.56   | 0      | 0      | 1.16  | 0      |
| 1433.85   | 5.59            | 3.19   | 2.4    | 0                  | 2.47   | 0      | 0      | 2.21  | 0      |
| 1434.31   | 2.93            | 2.07   | 0.86   | 1.4                | 0      | 1.42   | 0.14   | 0     | 0.06   |
| 1441.42   | 0.03            | 0.02   | 0.01   | 0                  | 0.03   | 0      | 0      | 0     | 0      |
| 1441.45   | 17.42           | 10.58  | 6.83   | 6.36               | 0      | 7.01   | 4.5    | 0     | 3.52   |
| 1444.05   | 1.47            | 0.84   | 0.63   | 0                  | 0.01   | 0      | 0      | 1.23  | 0      |
| 1444.41   | 8.6             | 5.13   | 3.47   | 5.27               | 0      | 2.43   | 3.27   | 0     | 0.72   |
| 1451.23   | 4.23            | 3.77   | 0.46   | 2.84               | 0      | 0.08   | 2.49   | 0     | 0      |
| 1453.02   | 2.19            | 1.25   | 0.94   | 0                  | 0.57   | 0      | 0      | 1.27  | 0      |
| 1453.83   | 6.89            | 3.93   | 2.95   | 0                  | 4.99   | 0      | 0      | 0.77  | 0      |
| 1454.59   | 13.55           | 7.94   | 5.61   | 0.88               | 0      | 6.13   | 3.95   | 0     | 5.37   |
| 1456.84   | 108.25          | 75.78  | 32.47  | 48.22              | 0      | 41.6   | 3.11   | 0     | 30.32  |
| 1457.72   | 1.84            | 1.05   | 0.79   | 0                  | 1.28   | 0      | 0      | 0.26  | 0      |
| 1460.20   | 87.13           | 68.94  | 18.19  | 2.41               | 0      | 0.48   | 120.01 | 0     | 0      |
| 1461.38   | 81.1            | 46.34  | 34.76  | 0                  | 52.79  | 0      | 0      | 15.07 | 0      |
| 1489.45   | 58.72           | 54.42  | 4.3    | 12.97              | 0      | 1.75   | 52.29  | 0     | 5.05   |
| 1492.26   | 10.67           | 6.1    | 4.57   | 0                  | 5.98   | 0      | 0      | 2.95  | 0      |
| 1515.79   | 16.34           | 14.08  | 2.26   | 0.45               | 0      | 0.7    | 18.25  | 0     | 1.69   |
| 1519.33   | 5.1             | 2.92   | 2.19   | 0                  | 0.83   | 0      | 0      | 3.44  | 0      |
| 1528.60   | 0.01            | 0.01   | 0      | 0                  | 0      | 0      | 0      | 0.01  | 0      |



| Frequency | Polycrystalline Response |                 |             | Single-Crystalline Response |      |       |       |      |       |
|-----------|--------------------------|-----------------|-------------|-----------------------------|------|-------|-------|------|-------|
|           | Total                    | $I_{\parallel}$ | $I_{\perp}$ | xx                          | xy   | xz    | yy    | yz   | zz    |
| 1528.72   | 42.55                    | 40.14           | 2.41        | 16.77                       | 0    | 4.62  | 14.31 | 0    | 12.36 |
| 1721.50   | 28.55                    | 22.12           | 6.42        | 0.23                        | 0    | 0     | 40.72 | 0    | 0     |
| 1722.74   | 5.43                     | 3.1             | 2.33        | 0                           | 4.07 | 0     | 0     | 0.47 | 0     |
| 1779.07   | 43.82                    | 35.36           | 8.46        | 0.22                        | 0    | 0.01  | 60.04 | 0    | 0.97  |
| 1788.28   | 7.54                     | 4.31            | 3.23        | 0                           | 1.73 | 0     | 0     | 4.58 | 0     |
| 1954.26   | 78                       | 65.74           | 12.26       | 39.11                       | 0    | 15.41 | 1.06  | 0    | 34.75 |
| 1963.84   | 0.52                     | 0.3             | 0.22        | 0                           | 0.31 | 0     | 0     | 0.12 | 0     |
| 2780.07   | 22.5                     | 17.06           | 5.44        | 12.5                        | 0    | 7.26  | 0     | 0    | 5.72  |
| 2780.14   | 0.62                     | 0.36            | 0.27        | 0                           | 0.11 | 0     | 0     | 0.41 | 0     |
| 2785.63   | 6.1                      | 3.49            | 2.61        | 0                           | 2.74 | 0     | 0     | 2.37 | 0     |
| 2785.64   | 11.84                    | 10.65           | 1.19        | 2.23                        | 0    | 1.63  | 8.04  | 0    | 1.73  |
| 2790.77   | 6.08                     | 5.01            | 1.07        | 2.58                        | 0    | 1.85  | 0.41  | 0    | 1.68  |
| 2790.86   | 1.24                     | 0.71            | 0.53        | 0                           | 0.63 | 0     | 0     | 0.41 | 0     |
| 2803.17   | 3.7                      | 2.11            | 1.58        | 0                           | 1.03 | 0     | 0     | 2.07 | 0     |
| 2803.25   | 14.68                    | 13.3            | 1.38        | 1.81                        | 0    | 0.92  | 13.37 | 0    | 1.81  |
| 2816.61   | 0.52                     | 0.3             | 0.22        | 0                           | 0.24 | 0     | 0     | 0.19 | 0     |
| 2816.71   | 19.78                    | 17.61           | 2.17        | 13.78                       | 0    | 2.44  | 5.99  | 0    | 1.06  |
| 2817.49   | 15.57                    | 10.32           | 5.25        | 16.7                        | 0    | 2.32  | 2.32  | 0    | 0.73  |
| 2817.56   | 1.03                     | 0.59            | 0.44        | 0                           | 0.86 | 0     | 0     | 0.01 | 0     |
| 2825.05   | 9.56                     | 8.69            | 0.87        | 2.56                        | 0    | 0.72  | 7.58  | 0    | 0.63  |
| 2825.17   | 5.43                     | 3.1             | 2.33        | 0                           | 3.02 | 0     | 0     | 1.53 | 0     |
| 2833.70   | 9.25                     | 7.84            | 1.41        | 0.49                        | 0    | 0.02  | 11.77 | 0    | 0.2   |
| 2833.72   | 0.92                     | 0.53            | 0.39        | 0                           | 0.54 | 0     | 0     | 0.23 | 0     |
| 2835.38   | 0.28                     | 0.16            | 0.12        | 0                           | 0.06 | 0     | 0     | 0.18 | 0     |
| 2835.39   | 12.21                    | 9.79            | 2.43        | 0.3                         | 0    | 0.02  | 16.8  | 0    | 0.02  |
| 2838.44   | 0.59                     | 0.34            | 0.25        | 0                           | 0.18 | 0     | 0     | 0.31 | 0     |
| 2838.53   | 2.41                     | 2.15            | 0.26        | 0.16                        | 0    | 0.08  | 2.56  | 0    | 0.26  |
| 2844.11   | 8.47                     | 7.81            | 0.65        | 4.11                        | 0    | 0.88  | 3.98  | 0    | 0.84  |
| 2844.30   | 1.58                     | 0.9             | 0.68        | 0                           | 0.74 | 0     | 0     | 0.57 | 0     |
| 2847.19   | 0.03                     | 0.02            | 0.01        | 0                           | 0    | 0     | 0     | 0.03 | 0     |
| 2847.61   | 3.45                     | 2.74            | 0.71        | 0.1                         | 0    | 0.02  | 4.73  | 0    | 0     |
| 2850.26   | 11.8                     | 9.76            | 2.04        | 0.31                        | 0    | 0     | 15.68 | 0    | 0.21  |
| 2850.46   | 0.64                     | 0.36            | 0.27        | 0                           | 0.53 | 0     | 0     | 0    | 0     |
| 2853.07   | 16.05                    | 13.17           | 2.88        | 12.99                       | 0    | 3.35  | 0.51  | 0    | 1.98  |
| 2853.12   | 2.06                     | 1.18            | 0.88        | 0                           | 1.44 | 0     | 0     | 0.28 | 0     |
| 2855.93   | 13.02                    | 10.72           | 2.3         | 7.68                        | 0    | 3.32  | 0.37  | 0    | 3.28  |
| 2855.95   | 0.48                     | 0.28            | 0.21        | 0                           | 0.24 | 0     | 0     | 0.17 | 0     |
| 2861.59   | 0.13                     | 0.07            | 0.06        | 0                           | 0.03 | 0     | 0     | 0.08 | 0     |
| 2861.68   | 4.84                     | 4.18            | 0.65        | 0.35                        | 0    | 0.01  | 5.9   | 0    | 0.15  |
| 2863.67   | 2.08                     | 1.19            | 0.89        | 0                           | 1.72 | 0     | 0     | 0.02 | 0     |
| 2863.76   | 5.59                     | 4.69            | 0.89        | 0.36                        | 0    | 0     | 7.18  | 0    | 0.05  |
| 2867.22   | 6.95                     | 6.08            | 0.86        | 4.4                         | 0    | 1.27  | 0.71  | 0    | 1.5   |
| 2867.25   | 1.53                     | 0.88            | 0.66        | 0                           | 0.65 | 0     | 0     | 0.63 | 0     |
| 2870.74   | 5.86                     | 5.4             | 0.46        | 3.29                        | 0    | 0.44  | 2.87  | 0    | 0.35  |
| 2870.79   | 1.98                     | 1.13            | 0.85        | 0                           | 1.46 | 0     | 0     | 0.2  | 0     |

## 7 References

### References

- (1) Juneja, N.; Unruh, D. K.; Hutchins, K. M. Engineering Colossal Anisotropic Thermal Expansion into Organic Materials through Dimensionality Control. *Chem. Mater.* **2023**, *35*, 7292–7300.
- (2) Sheldrick, G. M. Crystal structure refinement with SHELXL. *Acta Crystallogr. C* **2015**, *71*, 3–8.
- (3) Dolomanov, O. V.; Bourhis, L. J.; Gildea, R. J.; Howard, J. A. K.; Puschmann, H. OLEX2: a complete structure solution, refinement and analysis program. *Journal of Applied Crystallography* **2009**, *42*, 339–341.
- (4) Erba, A.; Desmarais, J. K.; Casassa, S.; Civalleri, B.; Donà, L.; Bush, I. J.; Searle, B.; Maschio, L.; Edith-Daga, L.; Cossard, A. et al. CRYSTAL23: A Program for Computational Solid State Physics and Chemistry. *J. Chem. Theory Comput.* **2022**, *19*, 6891–6932.
- (5) Perdew, J. P.; Burke, K.; Ernzerhof, M. Generalized Gradient Approximation Made Simple. *Phys. Rev. Lett.* **1996**, *77*, 3865–3868.
- (6) Krishnan, R.; Binkley, J. S.; Seeger, R.; Pople, J. A. Self-consistent molecular orbital methods. XX. A basis set for correlated wave functions. *J. Chem. Phys.* **1980**, *72*, 650–654.
- (7) Pascale, F.; Zicovich-Wilson, C. M.; López Gejo, F.; Civalleri, B.; Orlando, R.; Dovesi, R. The calculation of the vibrational frequencies of crystalline compounds and its implementation in the CRYSTAL code. *J. of Comput. Chem.* **2004**, *25*, 888–897.
- (8) Zicovich-Wilson, C. M.; Pascale, F.; Roetti, C.; Saunders, V. R.; Orlando, R.; Dovesi, R. Calculation of the vibration frequencies of  $\alpha$ -quartz: The effect of Hamiltonian and basis set. *J. Comput. Chem.* **2004**, *25*, 1873–1881.

- (9) Maschio, L.; Kirtman, B.; Rérat, M.; Orlando, R.; Dovesi, R. Ab initio analytical Raman intensities for periodic systems through a coupled perturbed Hartree-Fock/Kohn-Sham method in an atomic orbital basis. II. Validation and comparison with experiments. *J. Chem. Phys.* **2013**, *139*.
- (10) Maschio, L.; Kirtman, B.; Rérat, M.; Orlando, R.; Dovesi, R. Ab initio analytical Raman intensities for periodic systems through a coupled perturbed Hartree-Fock/Kohn-Sham method in an atomic orbital basis. I. Theory. *J. Chem. Phys.* **2013**, *139*.
- (11) Maschio, L.; Kirtman, B.; Rérat, M.; Orlando, R.; Dovesi, R. Comment on "Ab initio analytical infrared intensities for periodic systems through a coupled perturbed Hartree-Fock/Kohn-Sham method" [J. Chem. Phys. 137, 204113 (2012)]. *J. Chem. Phys.* **2013**, *139*.
